# Supplementary material for: Synthesis of Proposed Structure of Aaptoline B via Transition Metal-Catalyzed Cycloisomerization and Evaluation of Its Neuroprotective Properties in C. Elegans
Source: MDPI journal article supplement (doi:10.3390/app11199125), 2021-09-30

## Supporting Information

# Synthesis of Proposed Structure of Aaptoline B via Transition Metal-Catalyzed Cycloisomerization and Evaluation of Its Neuroprotective Properties in *C. Elegans*

Soobin Kim<sup>1</sup>, Woojin Yang<sup>2</sup>, Dongseok Cha<sup>2,\*</sup> and Youngtaek Han<sup>1,\*</sup>

1. College of Pharmacy, Dankook University, 119 Dandae-ro, Dongnam-gu, Cheonan , Chungnam , Korea; rue42351@naver.com

2. College of Pharmacy, Woosuk University, 443 Samnye-ro, Wanju-gun , Jeonbuk , Korea; benefinn@naver.com

\* Correspondence: hanyt@dankook.ac.kr (Y.T.H.); cha@woosuk.ac.kr (D.S.C.); Tel.: +82-41-550-1431

## Content

|                                                                                  |    |
|----------------------------------------------------------------------------------|----|
| Table S1. <sup>1</sup> H and <sup>13</sup> C-NMR assignment of aaptoline B ----- | S2 |
| <sup>1</sup> H NMR and <sup>13</sup> C NMR Spectra -----                         | S3 |

Table S1. <sup>1</sup>H- and <sup>13</sup>C-NMR assignment of aaptoline B.

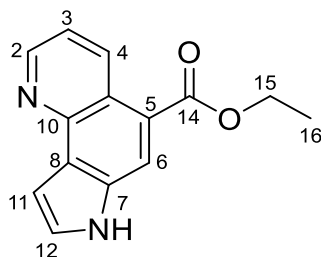

| Position | Reported <sup>[a]</sup>            |                   | Synthesized <sup>[b]</sup>         |            | Synthesized <sup>[c]</sup>         |            |
|----------|------------------------------------|-------------------|------------------------------------|------------|------------------------------------|------------|
|          | $\delta_H$ (multi, <i>J</i> in Hz) | $\delta_C$        | $\delta_H$ (multi, <i>J</i> in Hz) | $\delta_C$ | $\delta_H$ (multi, <i>J</i> in Hz) | $\delta_C$ |
| 2        | 9.49 (dd, 10.3, 2.1)               | 135.3             | 9.56 (d, 8.4)                      | 136.3      | 9.52 (dd, 8.4, 1.4)                | 137.2      |
| 3        | 7.48 (dd, 10.4, 5.0)               | 120.2             | 7.52 (m)                           | 120.1      | 7.51 (dd, 8.8, 4.6)                | 120.9      |
| 4        | 8.96 (dd, 5.2, 2.0)                | 149.2             | 8.96 (d, 3.2)                      | 148.2      | 8.79 (dd, 4.6, 1.8)                | 149.2      |
| 5        |                                    | 122.9             |                                    | 122.9      |                                    | 124.0      |
| 6        | 8.49 (s)                           | 118.9             | 8.52 (s)                           | 119.5      | 8.51 (s)                           | 121.1      |
| 7        |                                    | 128.0             |                                    | 127.1      |                                    | 134.7      |
| 8        |                                    | 132.8             |                                    | 133.1      |                                    | 128.2      |
| 9        |                                    | -, <sup>[d]</sup> |                                    | 120.4      |                                    | 120.8      |
| 10       |                                    | 120.8             |                                    | 143.1      |                                    | 144.7      |
| 11       | 7.45 (t, 3.0)                      | 104.1             | 7.52 (m)                           | 104.0      | 7.34 (t, 1.4)                      | 103.9      |
| 12       | 7.51 (t, 3.0)                      | 126.4             | 7.52 (m)                           | 126.8      | 7.59 (d, 2.8)                      | 128.6      |
| 13-NH    | 8.84 (br. s)                       |                   | 9.43 (br.s)                        |            |                                    |            |
| 14       |                                    | 167.4             |                                    | 167.3      |                                    | 168.7      |
| 15       | 4.49 (q, 8.5)                      | 61.1              | 4.47 (q, 7.1)                      | 61.2       | 4.45 (q, 7.2)                      | 62.2       |
| 16       | 1.48 (t, 8.5)                      | 14.6              | 1.46 (t, 7.1)                      | 14.6       | 1.46 (t, 7.0)                      | 14.9       |

<sup>[a]</sup> <sup>1</sup>H NMR and <sup>13</sup>C spectra were recorded in CDCl<sub>3</sub> at 600 MHz and 150 MHz, respectively.

<sup>[b]</sup> <sup>1</sup>H NMR and <sup>13</sup>C spectra were recorded in CDCl<sub>3</sub> at 500 MHz and 125 MHz, respectively.

<sup>[c]</sup> <sup>1</sup>H NMR and <sup>13</sup>C spectra were recorded in CD<sub>3</sub>OD at 700 MHz and 175 MHz, respectively.

<sup>[d]</sup> Could not be assigned in the previous study.

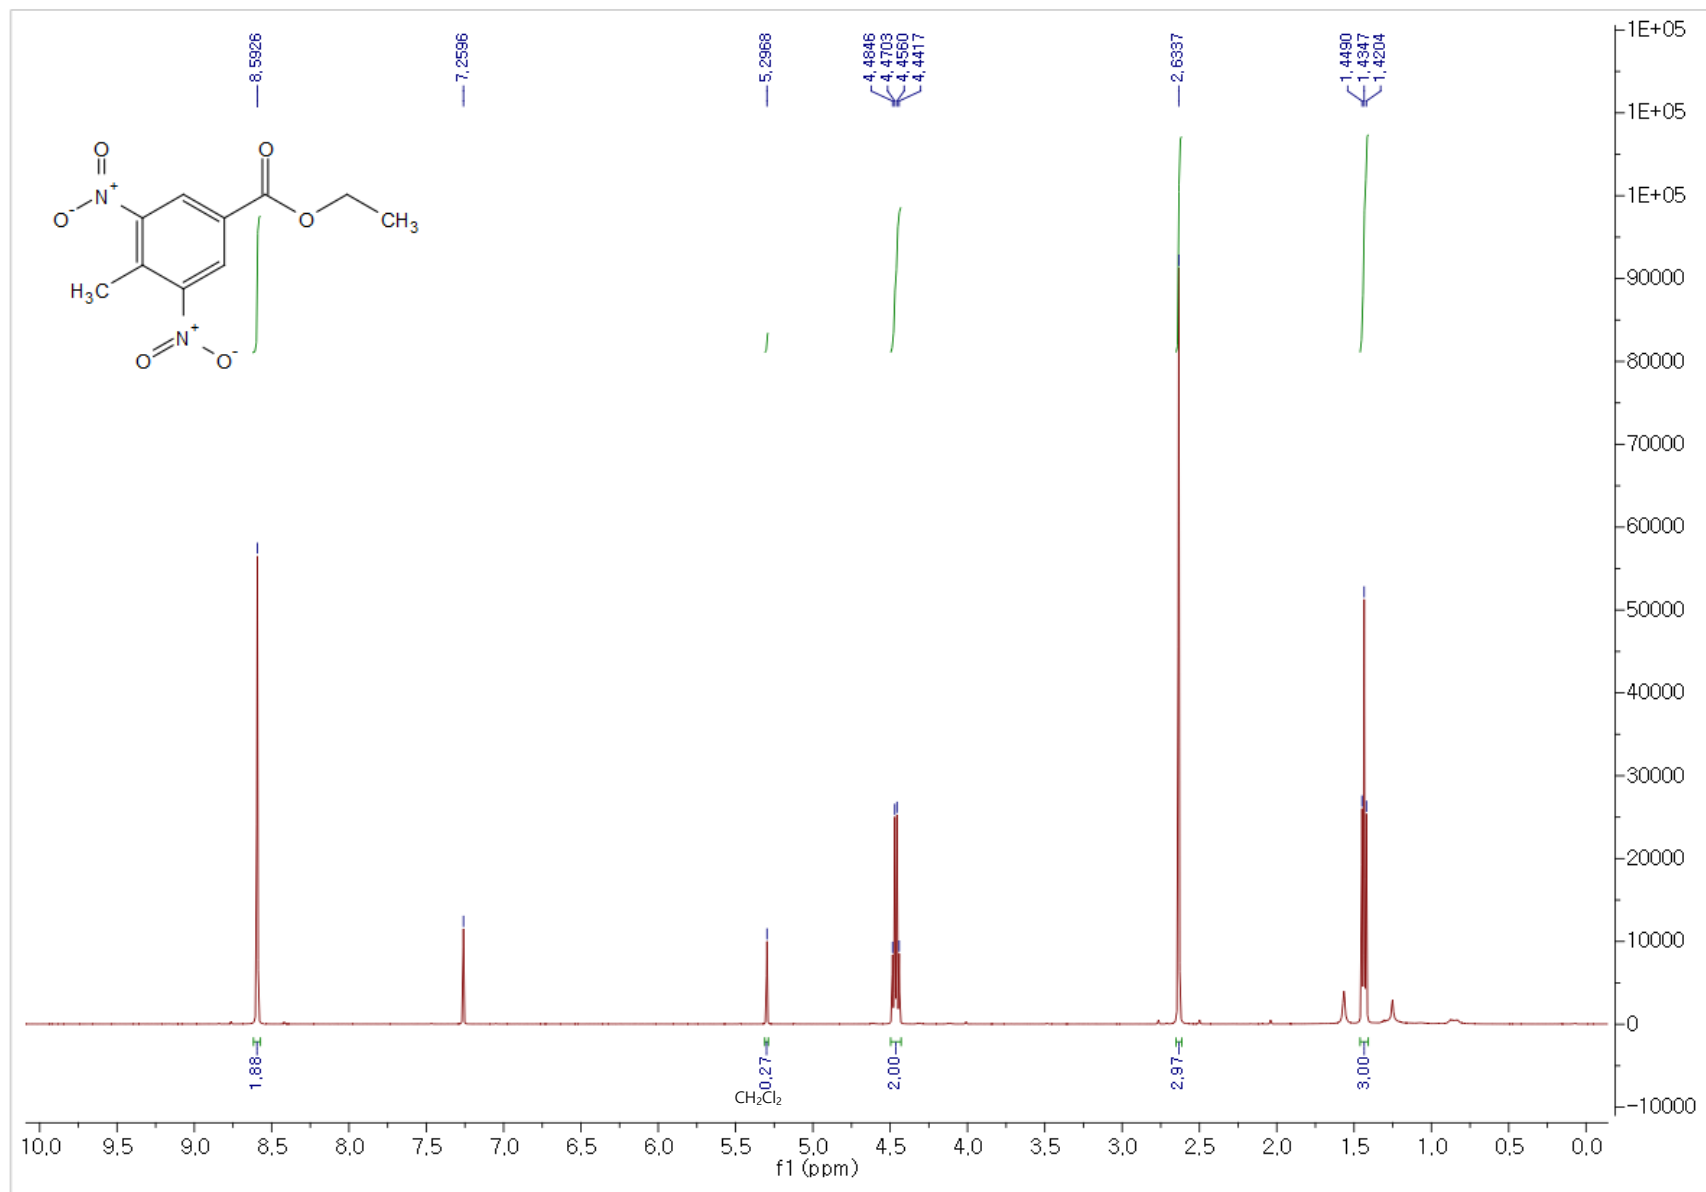

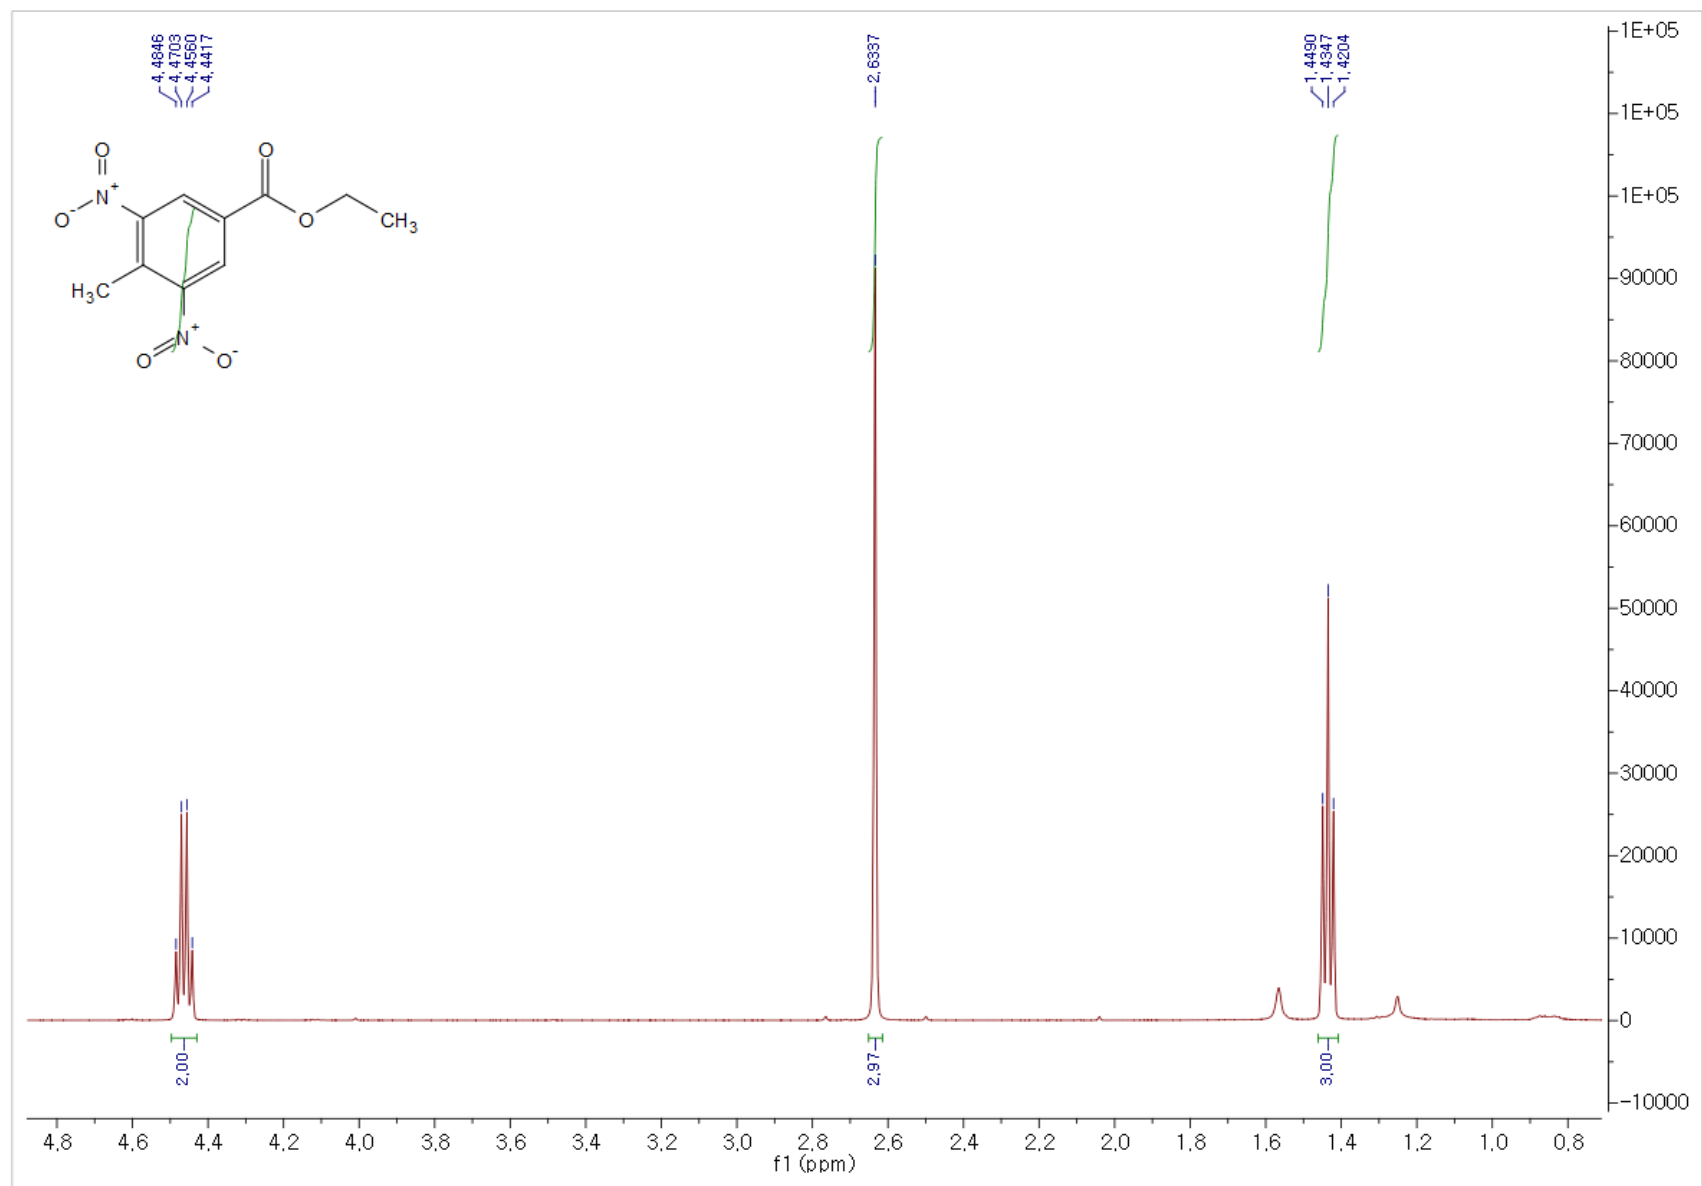

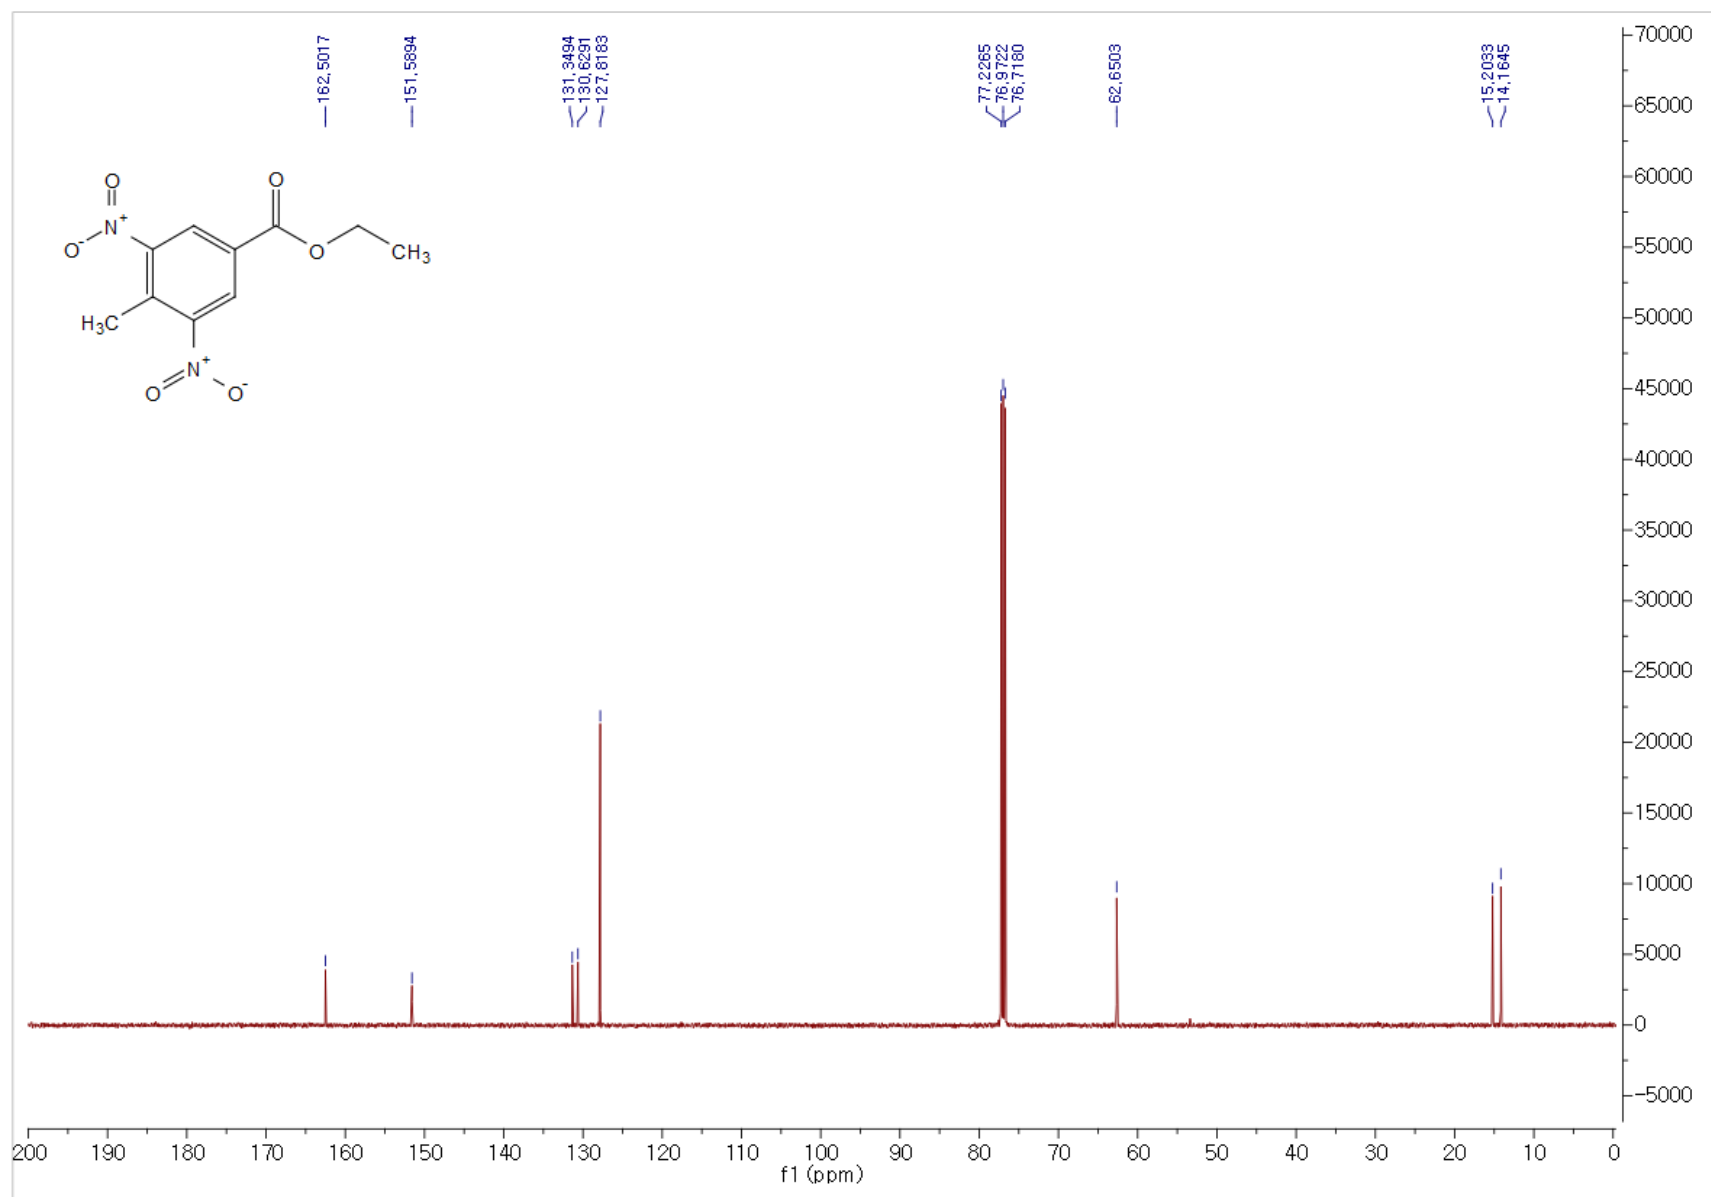

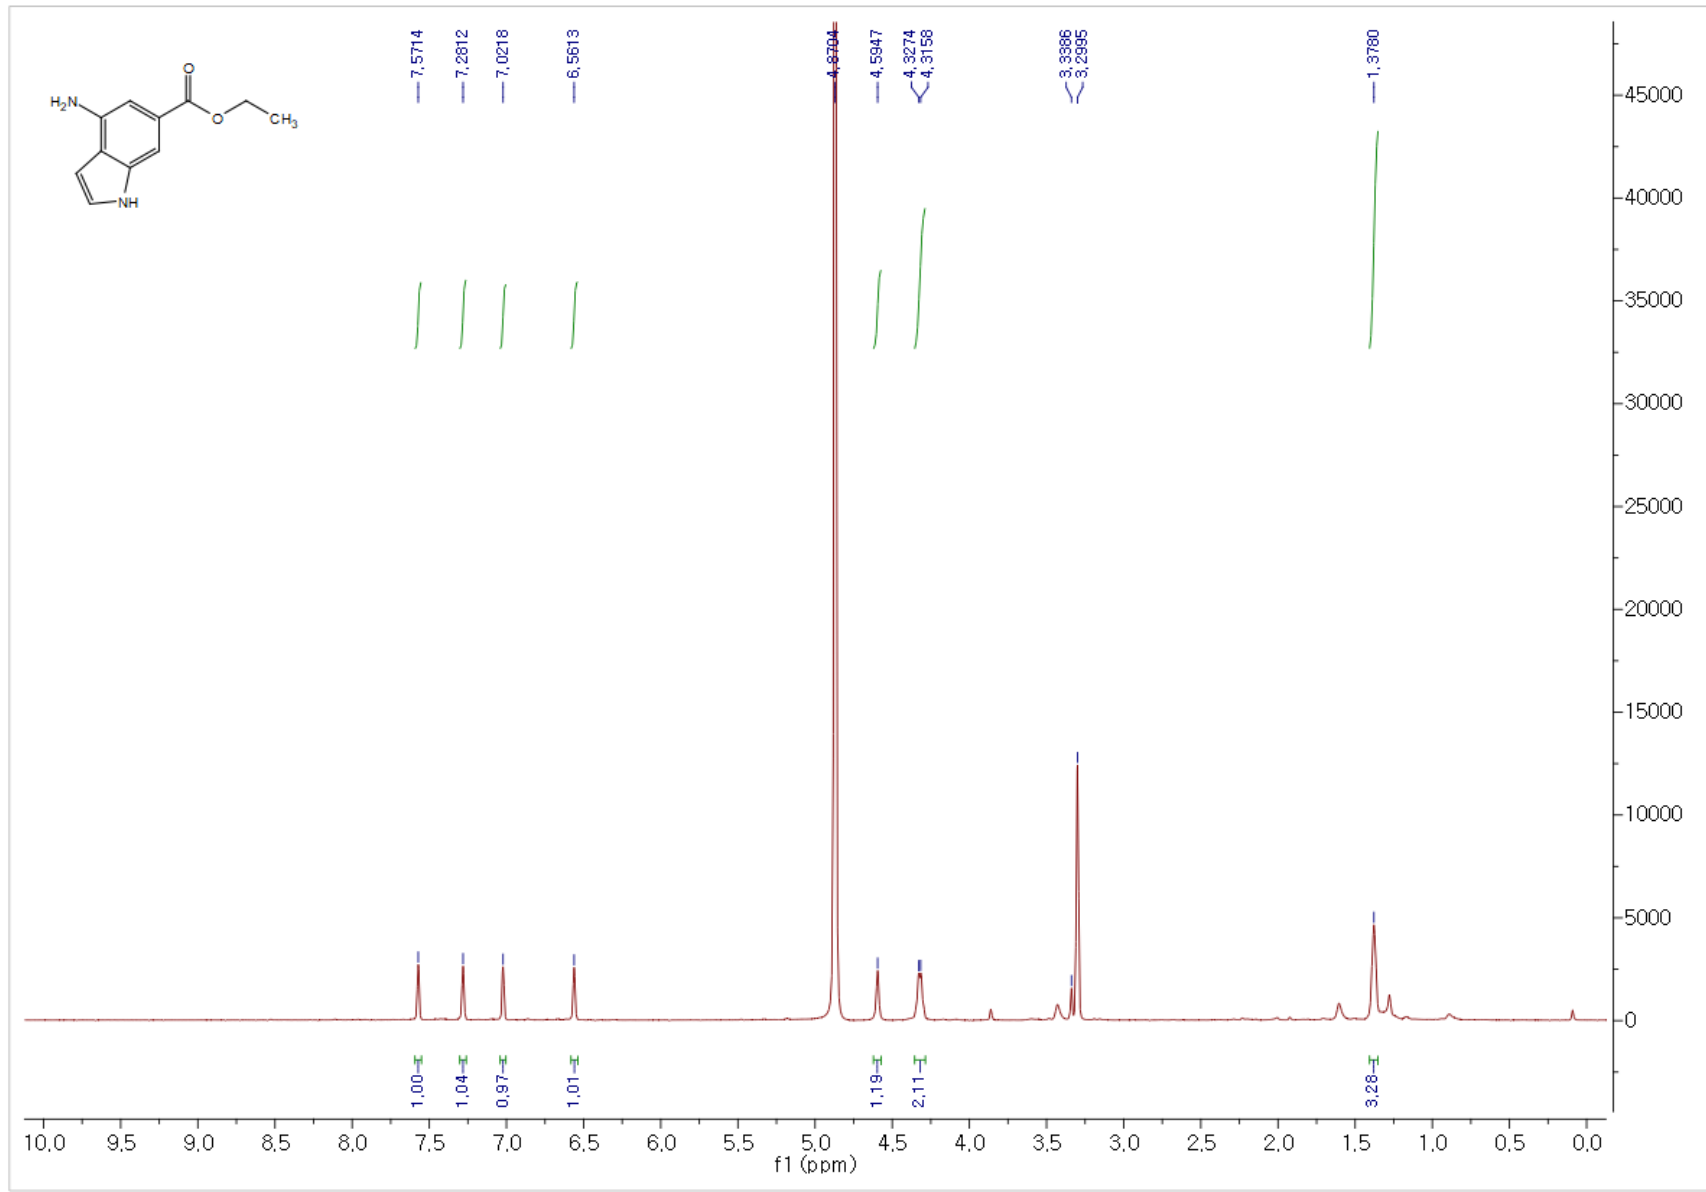

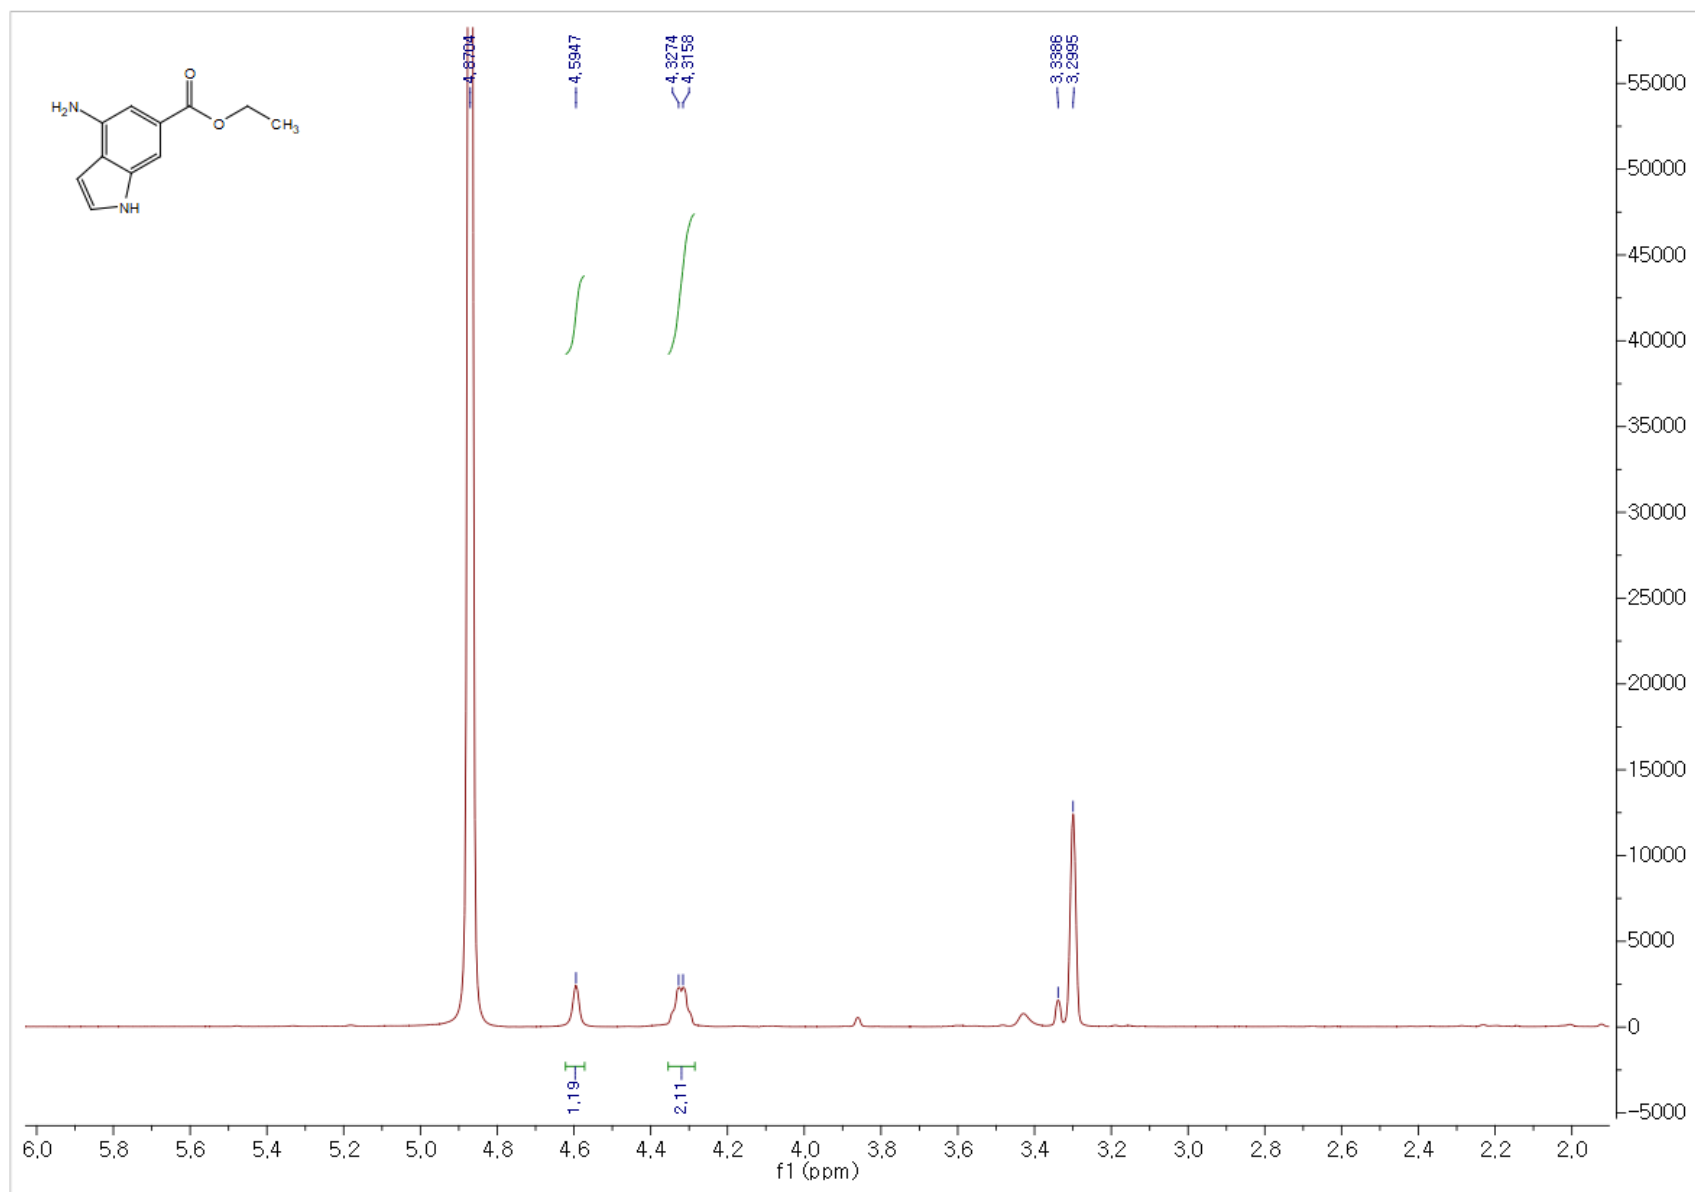

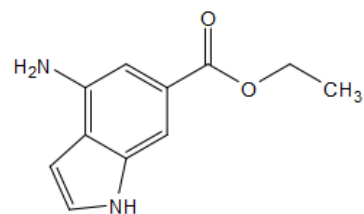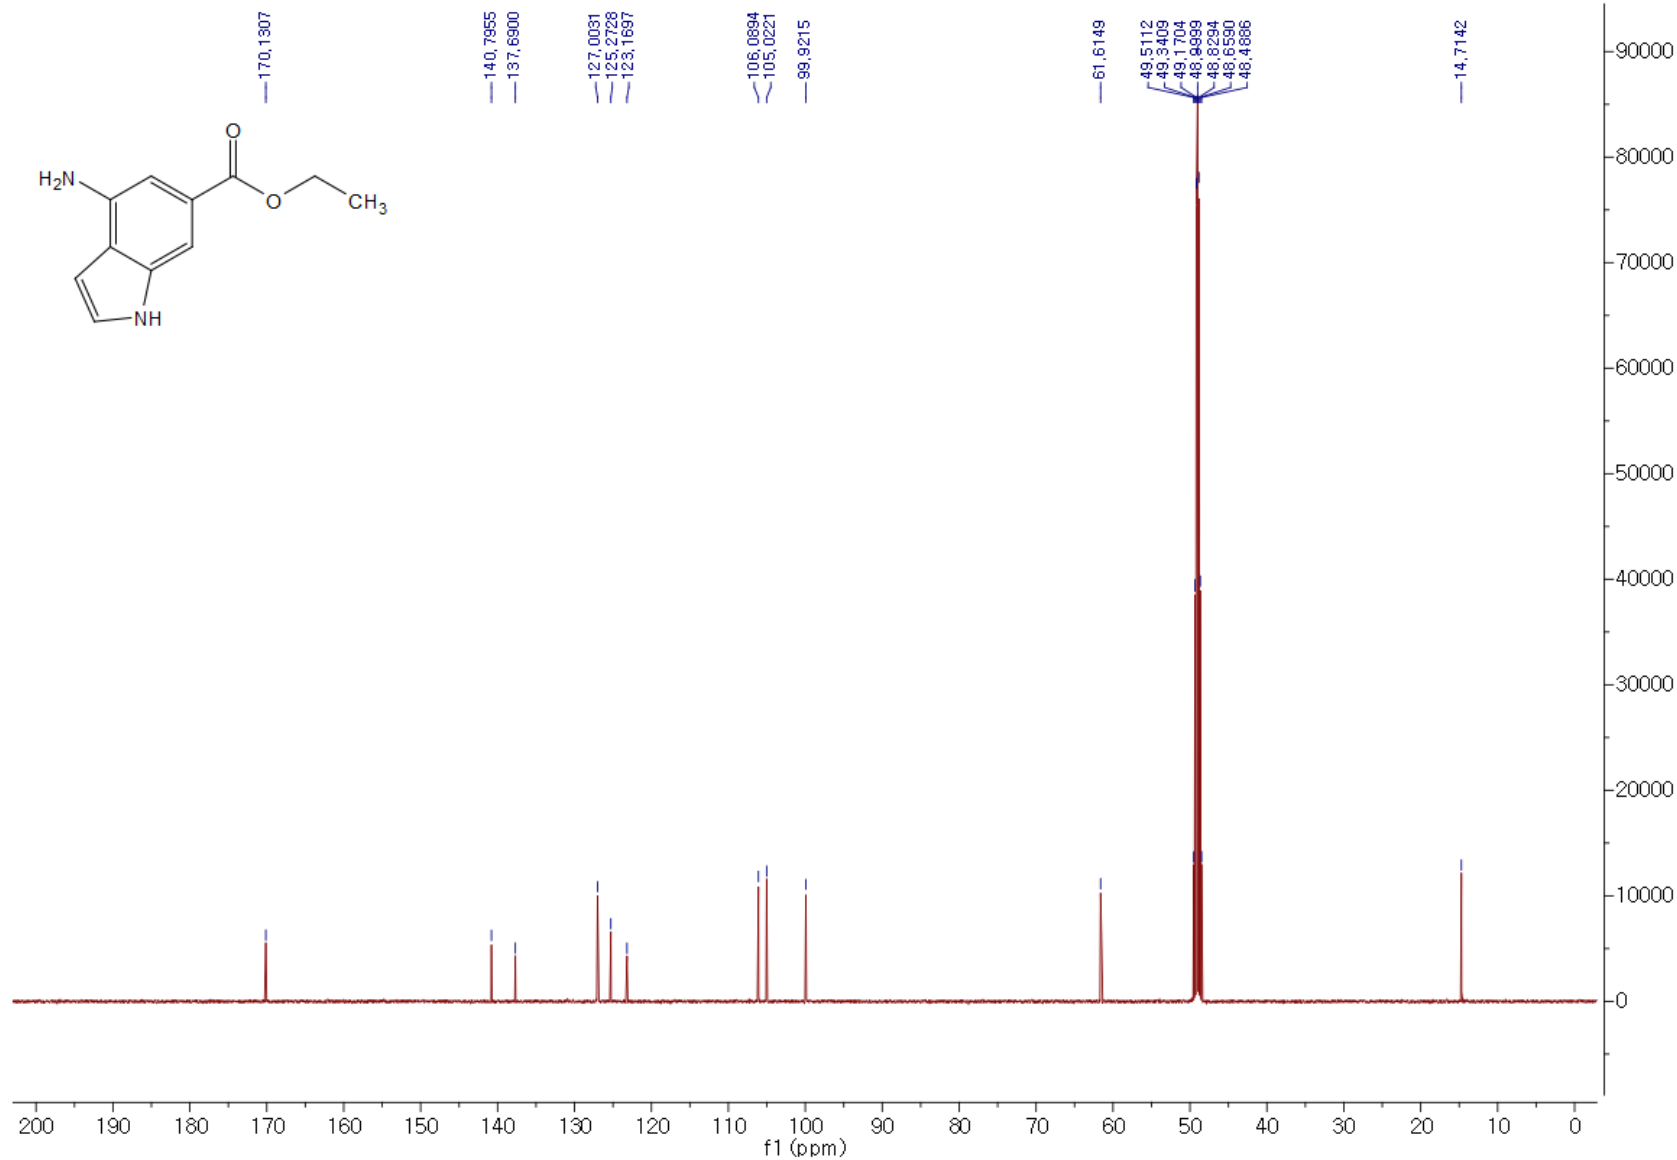



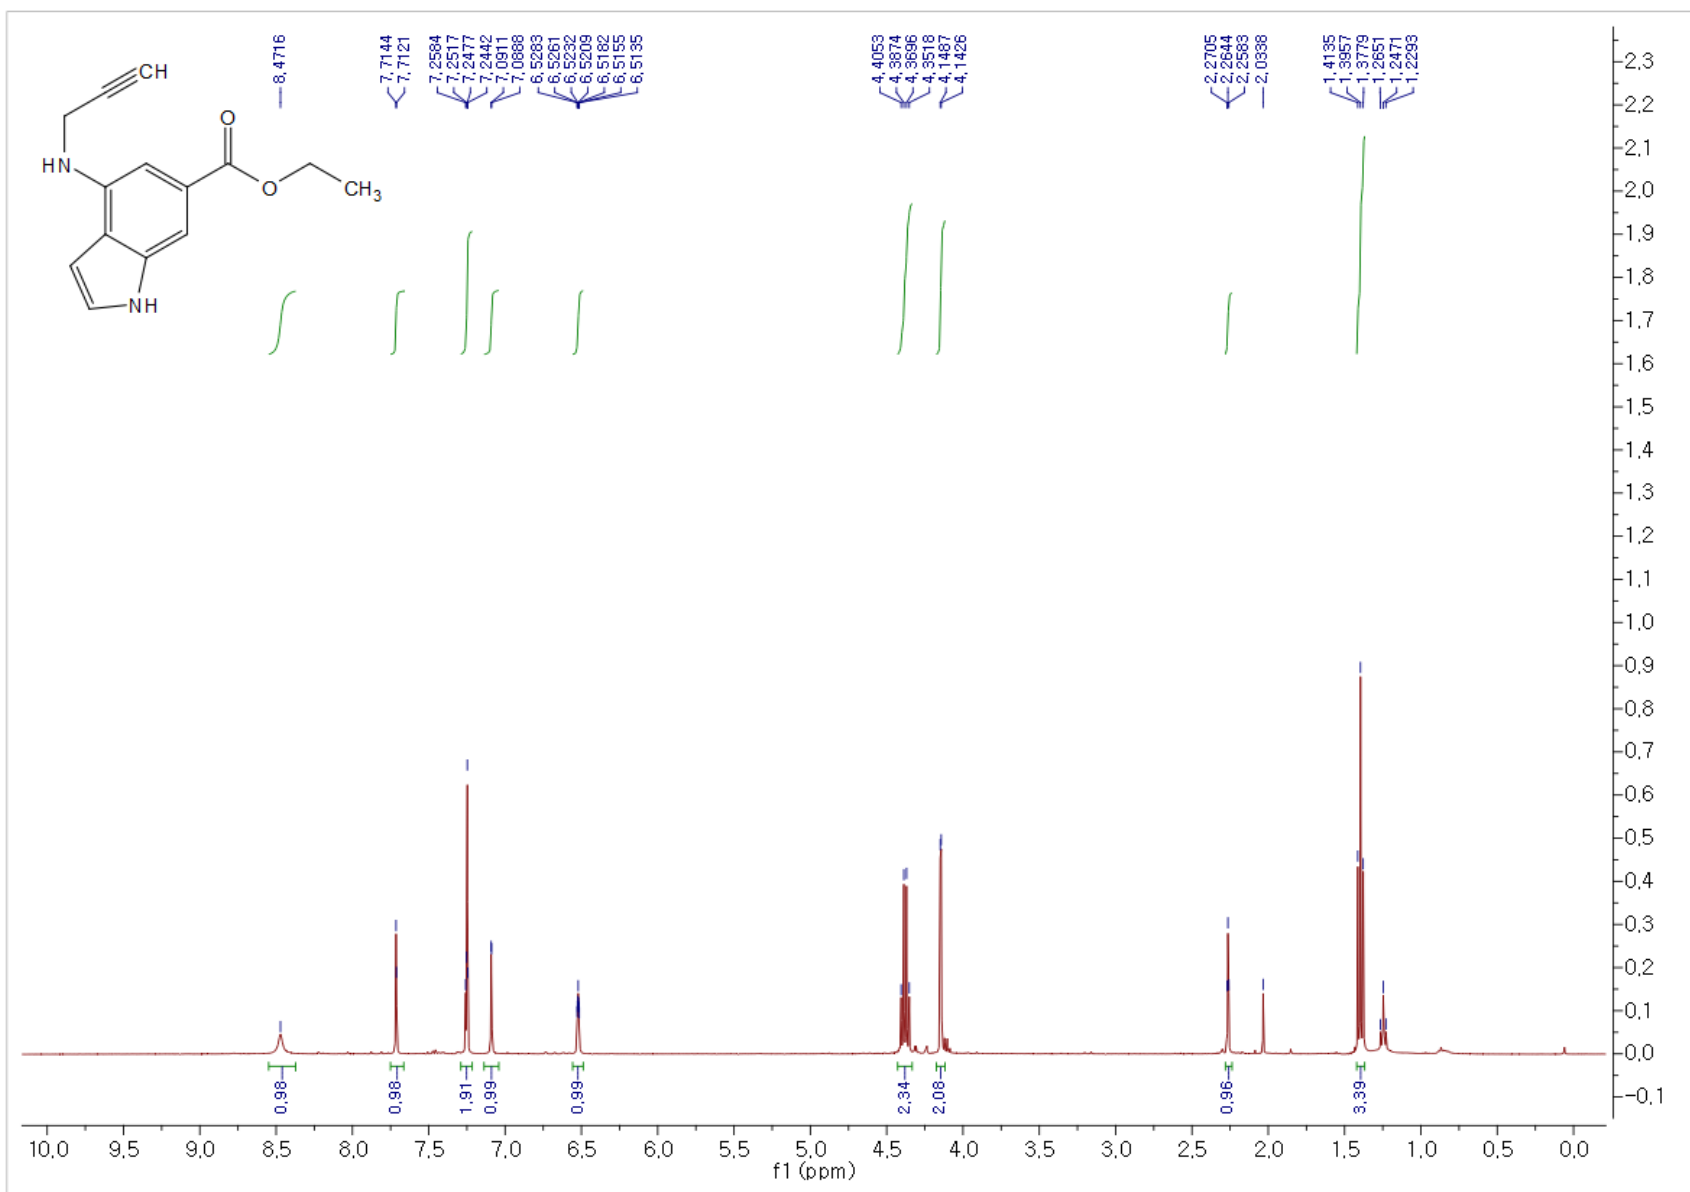

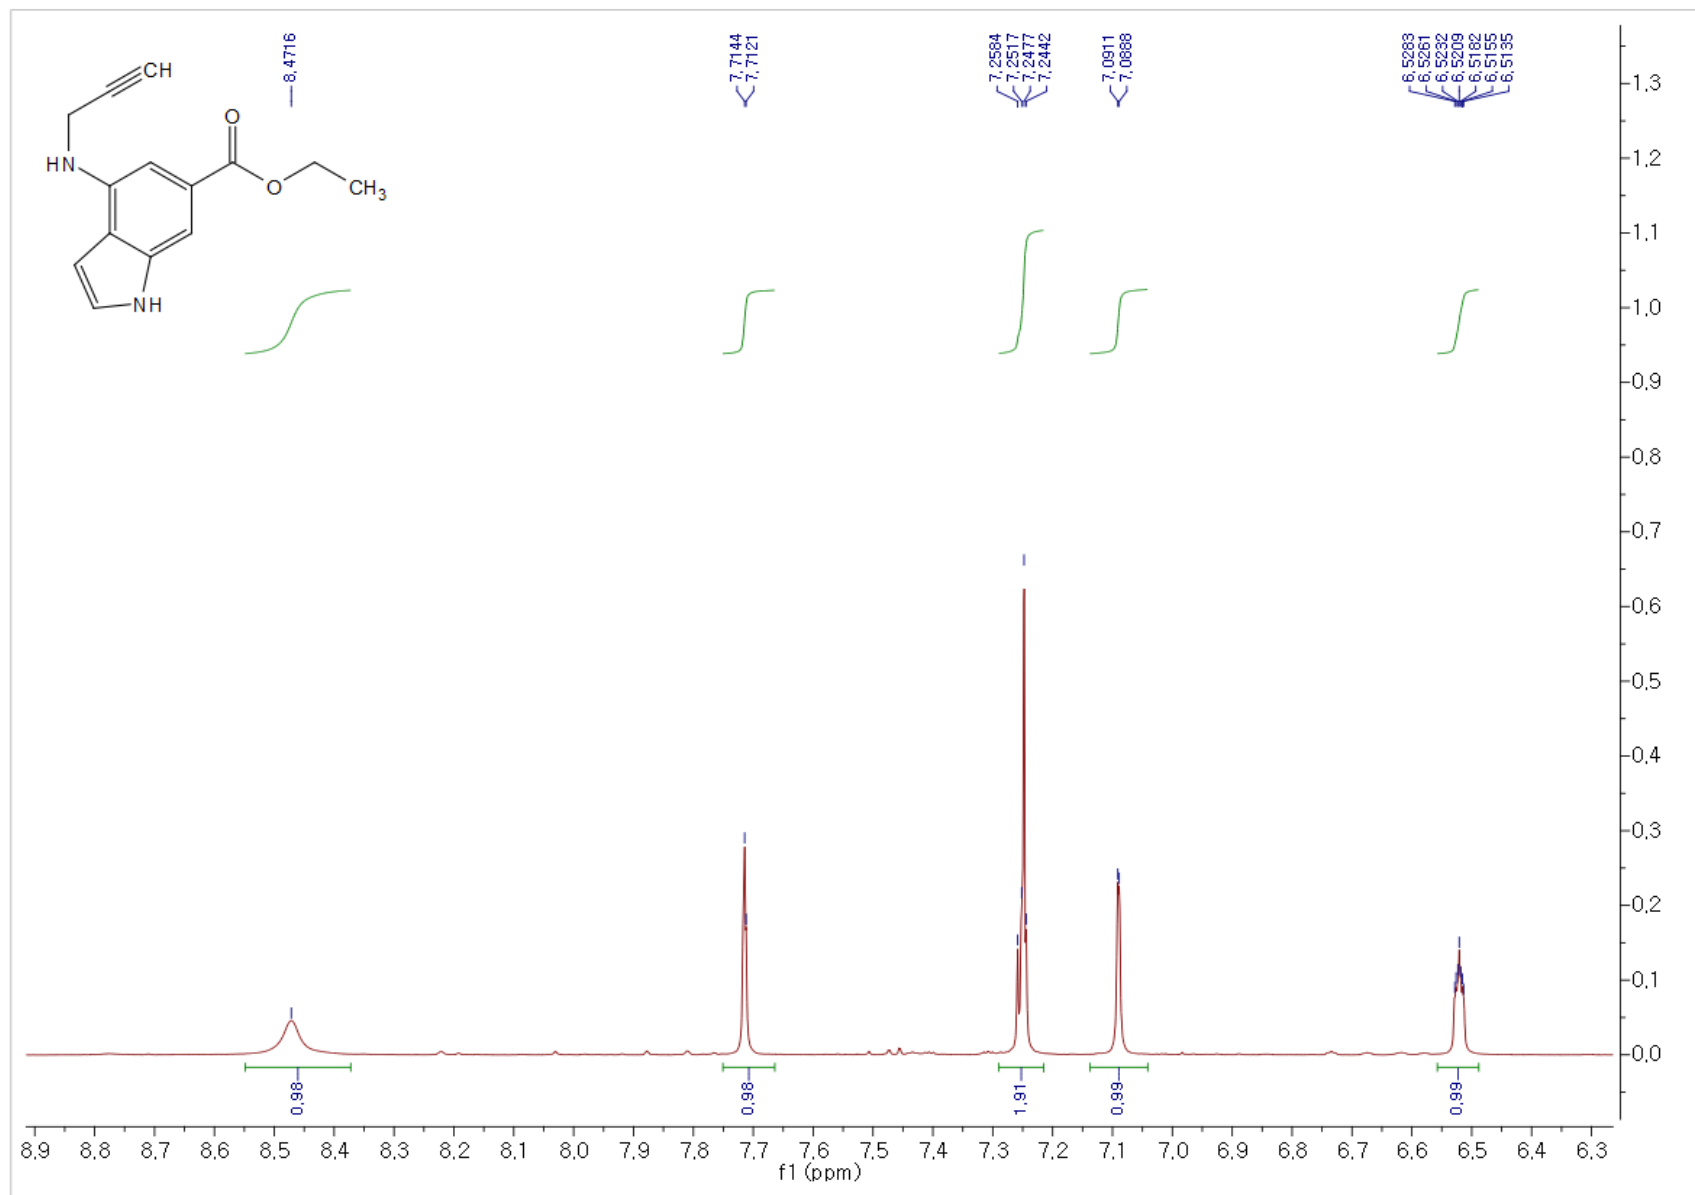

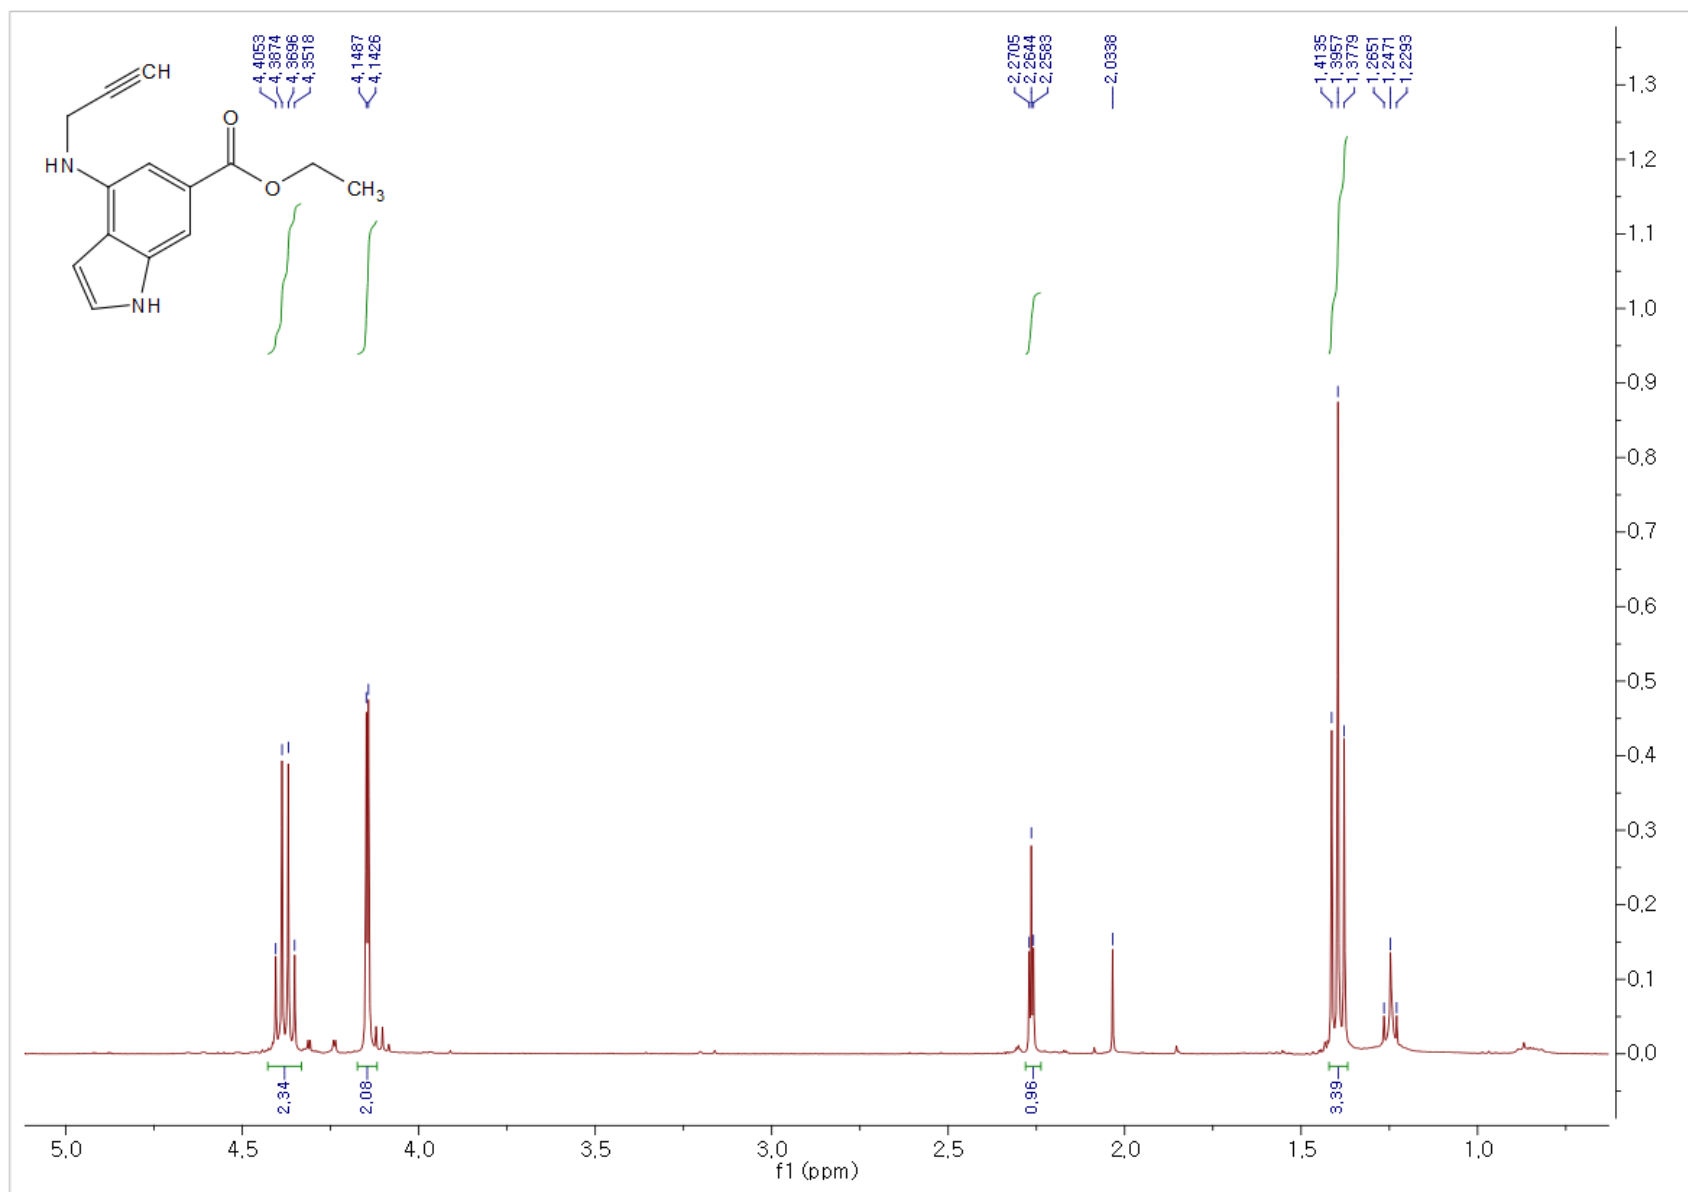

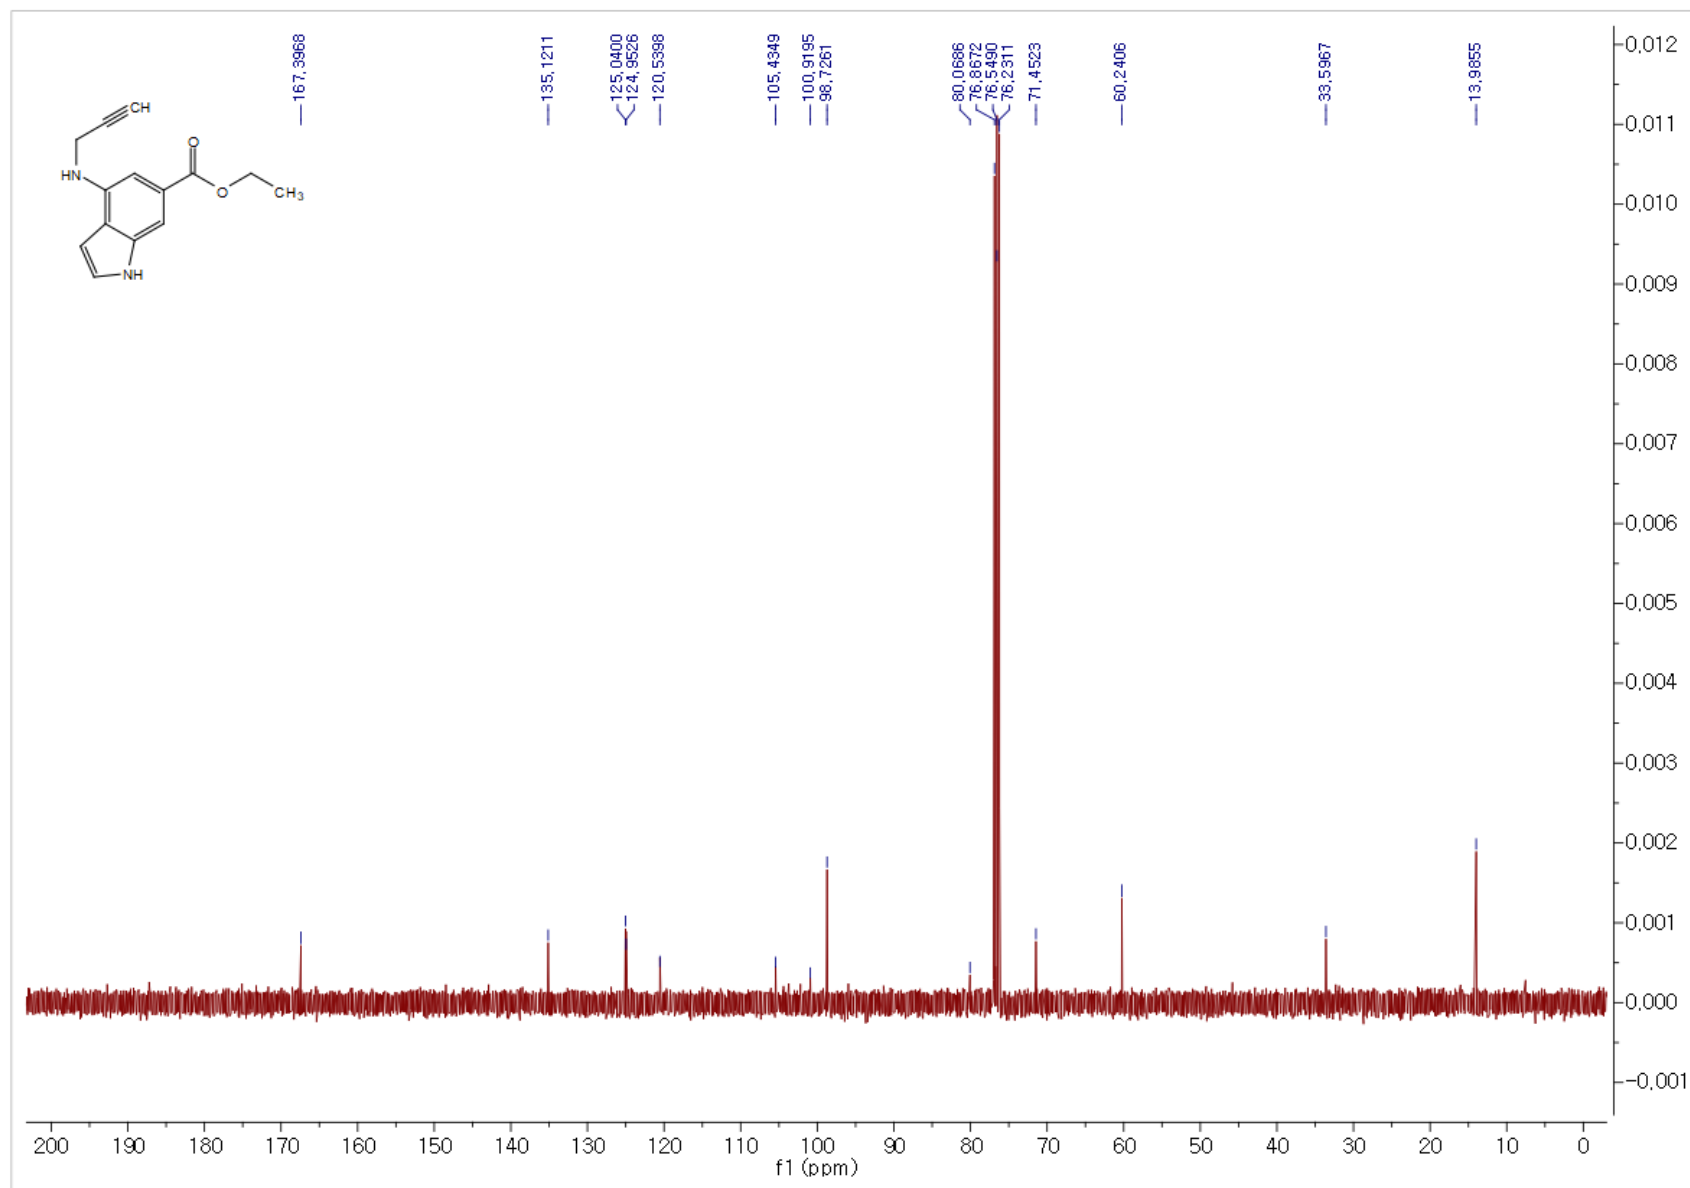

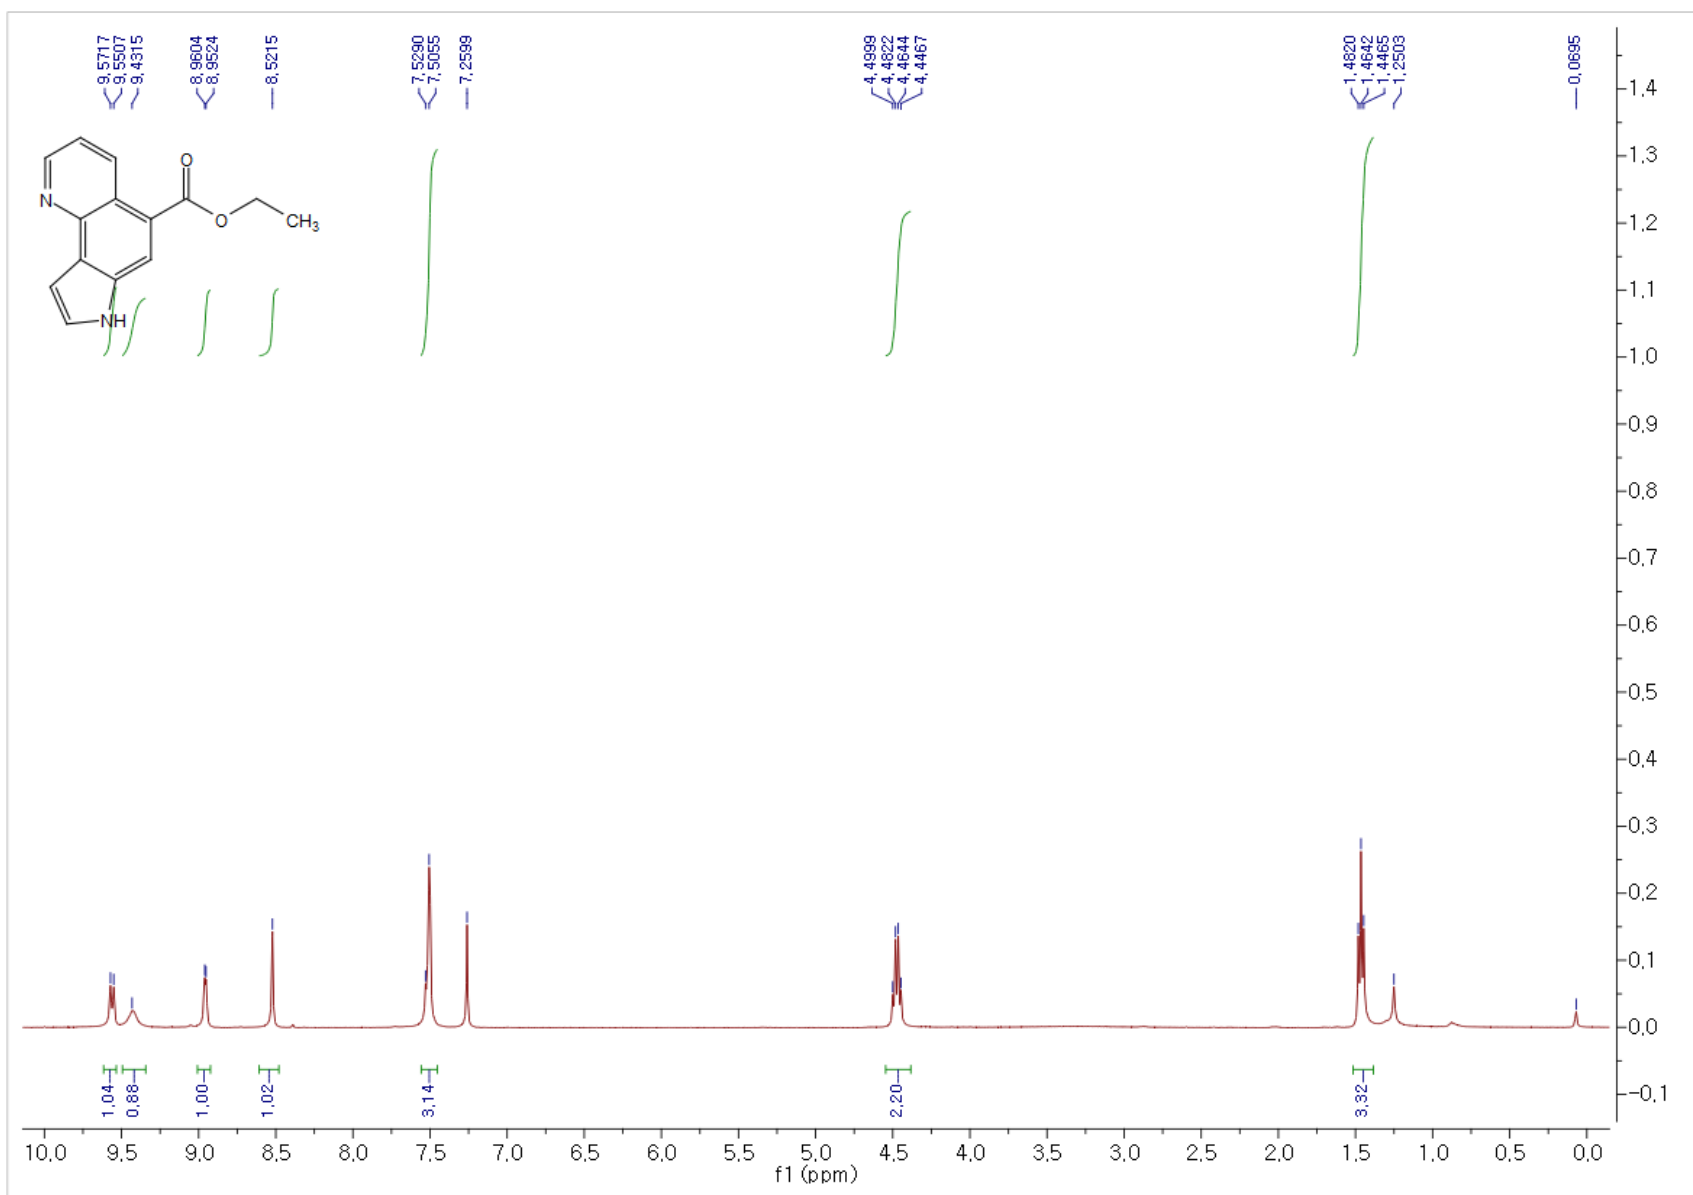

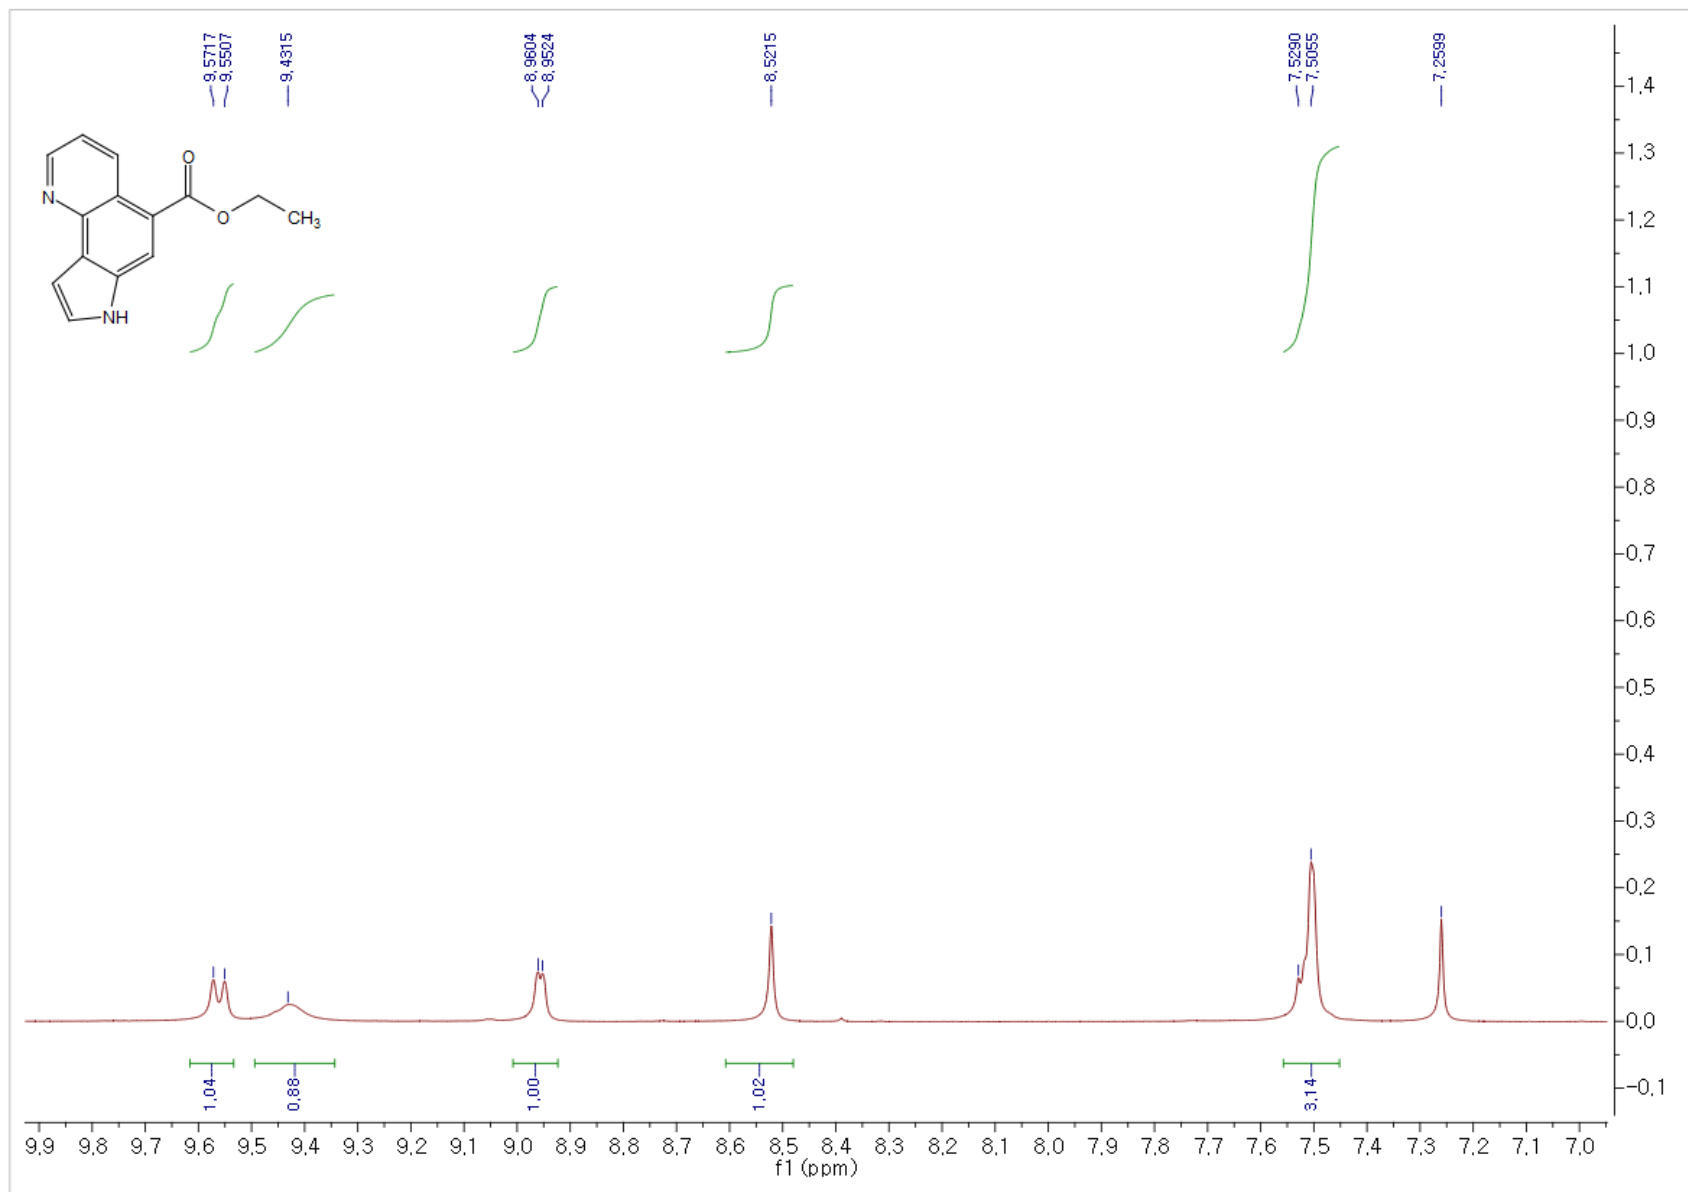

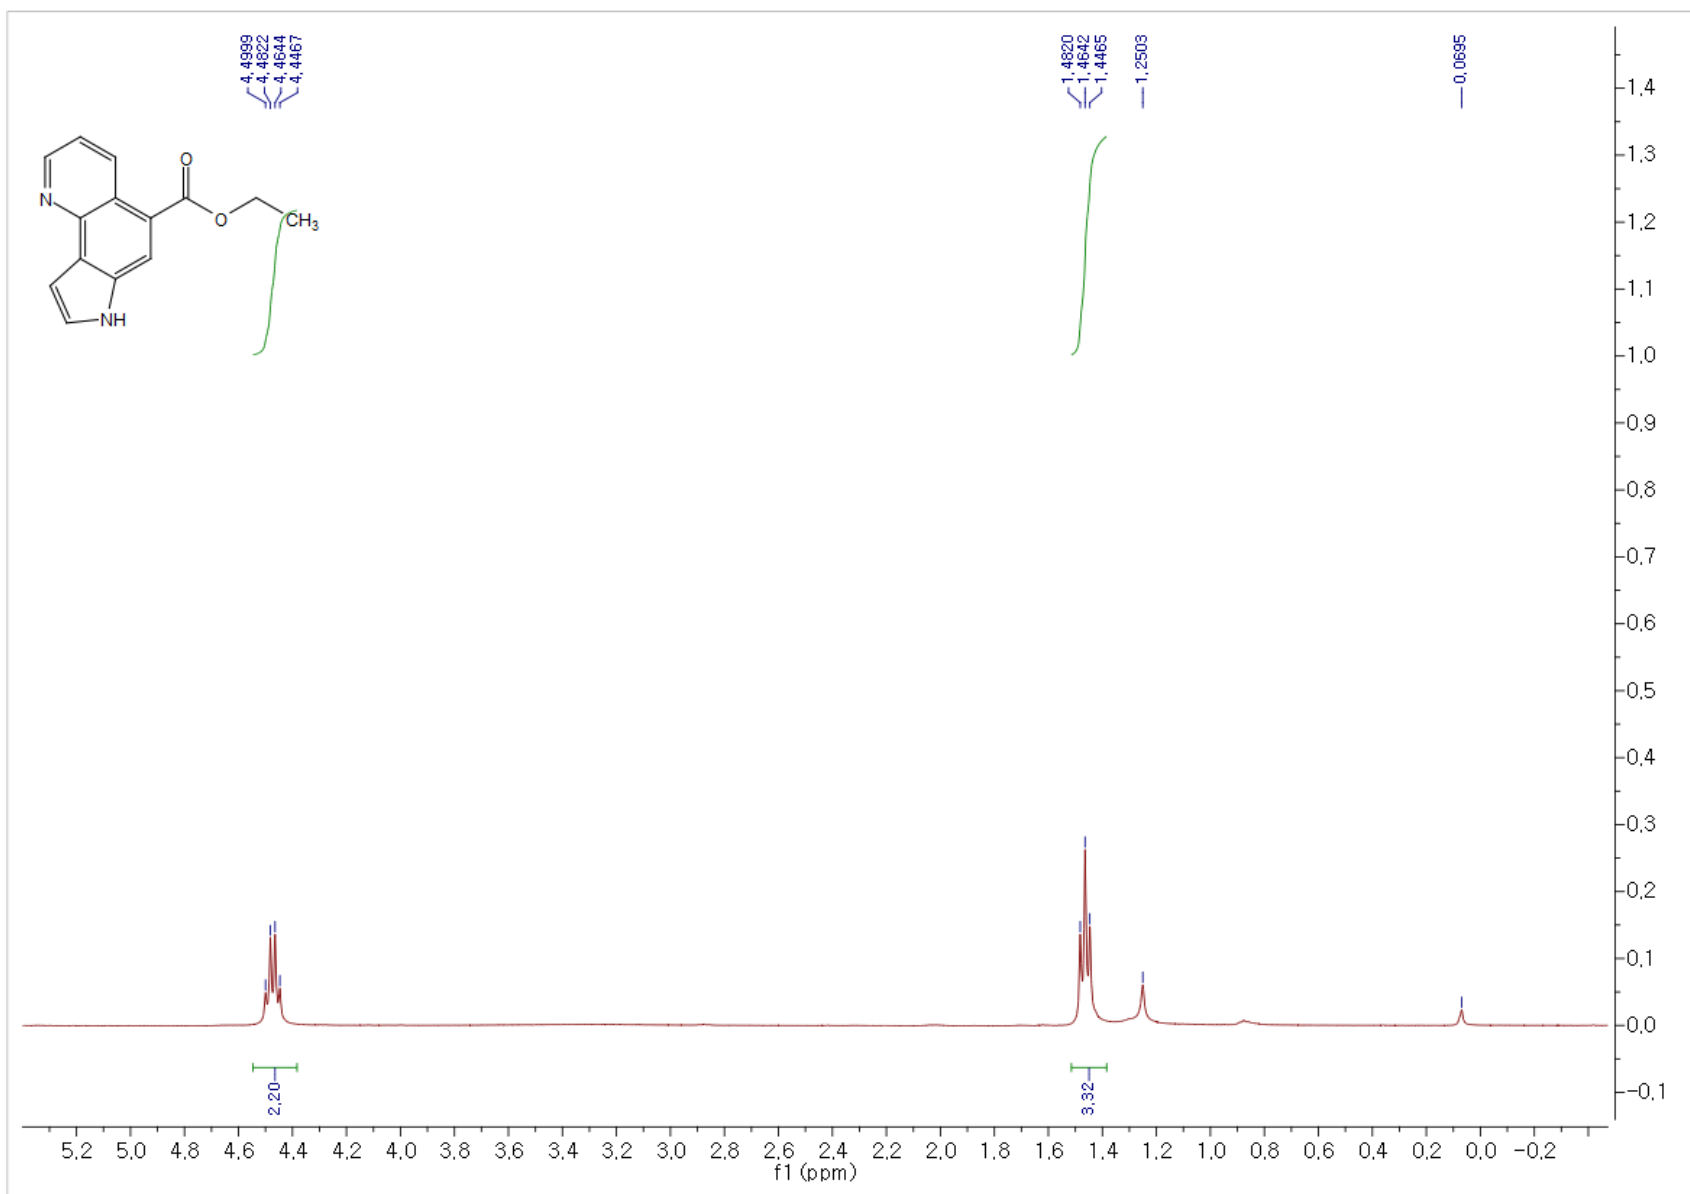

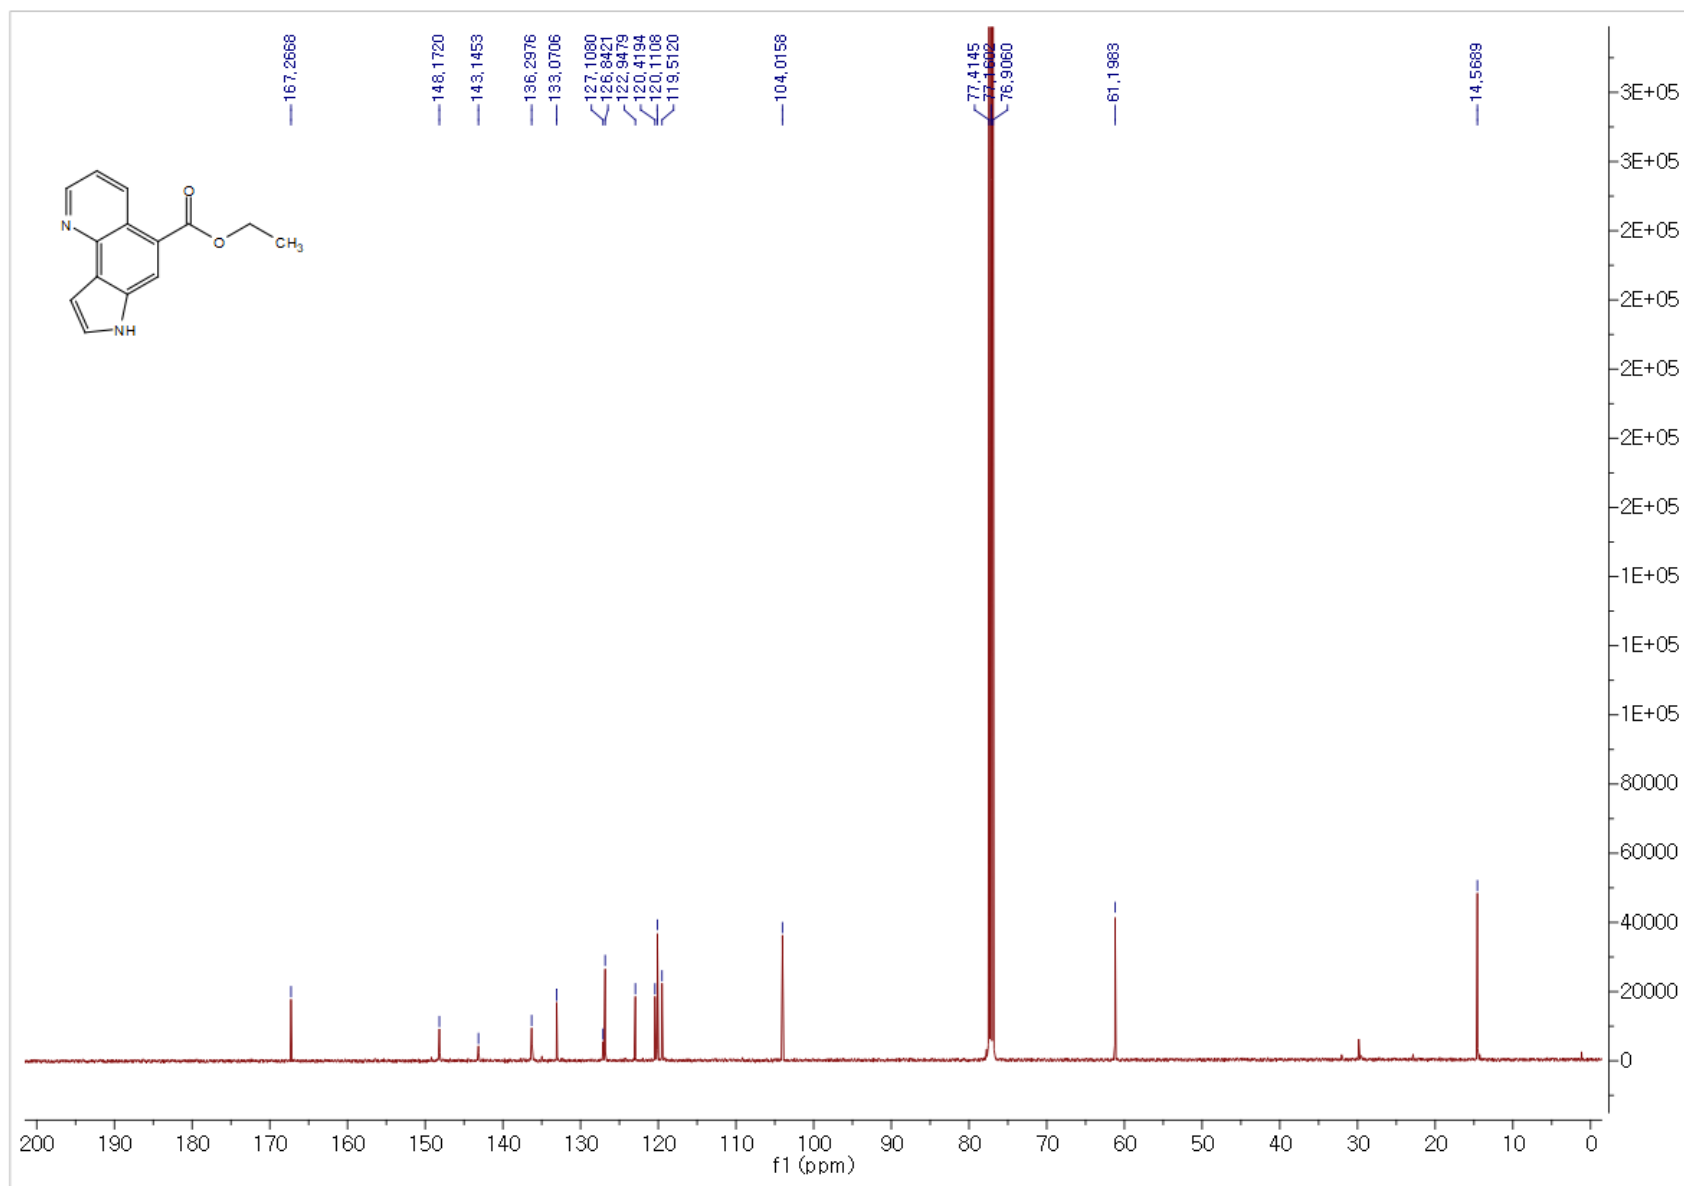



SB-03-08\_1H

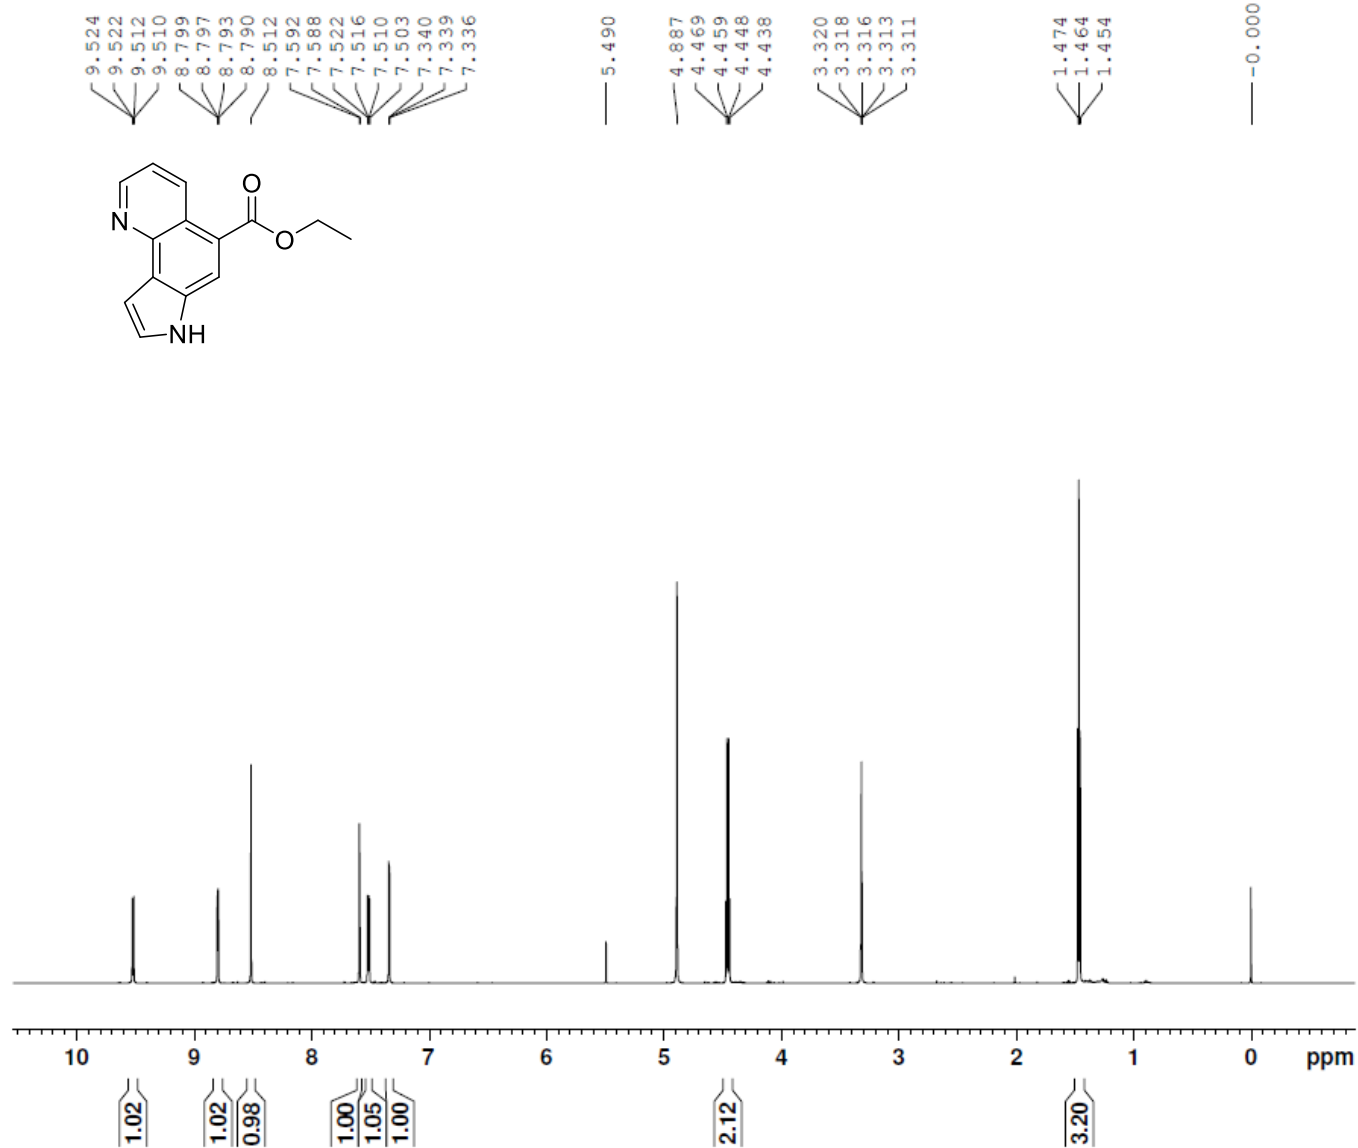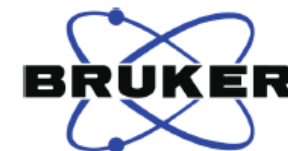

Current Data Parameters  
NAME WS2  
EXPNO 3  
PROCNO 1

F2 - Acquisition Parameters  
Date\_ 20210525  
Time 19.08 h  
INSTRUM spect  
PROBHD Z128968\_0001 (   
PULPROG zg30  
TD 65536  
SOLVENT MeOD  
NS 32  
DS 2  
SWH 14097.744 Hz  
FIDRES 0.430229 Hz  
AQ 2.3243434 sec  
RG 4.04  
DW 35.467 usec  
DE 10.00 usec  
TE 298.0 K  
D1 1.00000000 sec  
TD0 1  
SFO1 700.5343258 MHz  
NUC1 1H  
P1 15.00 usec  
PLW1 8.39560032 W

F2 - Processing parameters  
SI 65536  
SF 700.5300094 MHz  
WDW EM  
SSB 0  
LB 0.30 Hz  
GB 0  
PC 1.00

SB-03-08\_1H

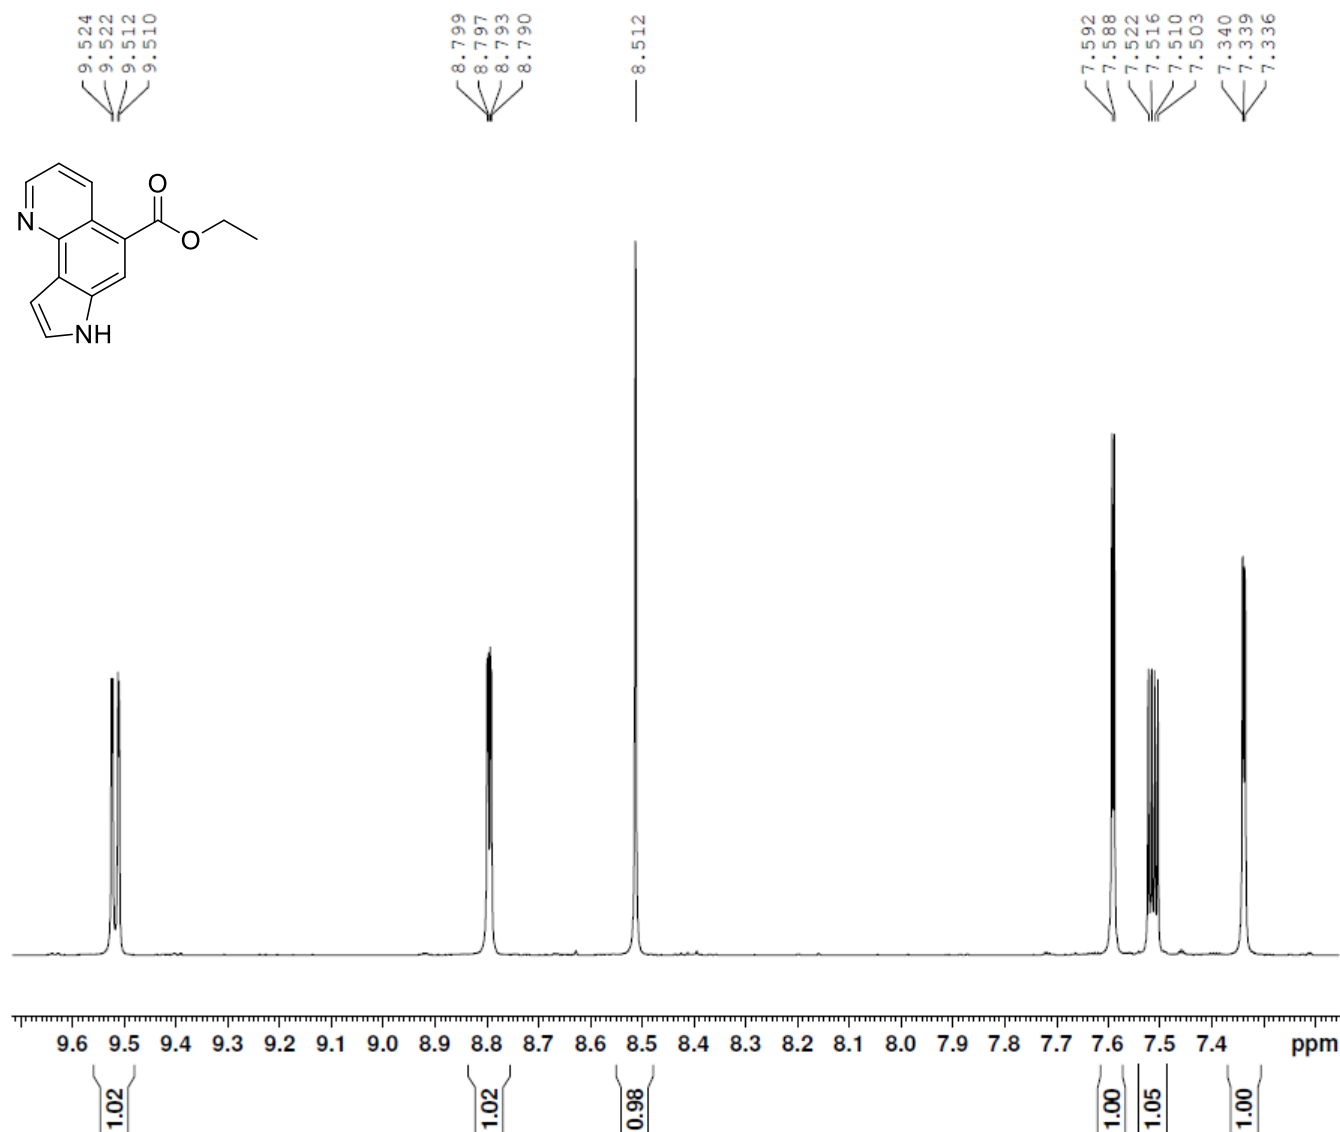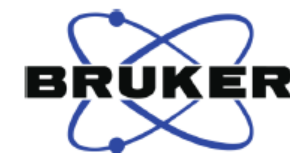

Current Data Parameters  
NAME WS2  
EXPNO 3  
PROCNO 1

F2 - Acquisition Parameters  
Date\_ 20210525  
Time 19.08 h  
INSTRUM spect  
PROBHD Z128968\_0001 (zg30)  
PULPROG zg30  
TD 65536  
SOLVENT MeOD  
NS 32  
DS 2  
SWH 14097.744 Hz  
FIDRES 0.430229 Hz  
AQ 2.3243434 sec  
RG 4.04  
DW 35.467 usec  
DE 10.00 usec  
TE 298.0 K  
D1 1.00000000 sec  
TD0 1  
SFO1 700.5343258 MHz  
NUC1 1H  
P1 15.00 usec  
PLW1 8.39560032 W

F2 - Processing parameters  
SI 65536  
SF 700.5300094 MHz  
WDW EM  
SSB 0  
LB 0.30 Hz  
GB 0  
PC 1.00

SB-03-08\_1H

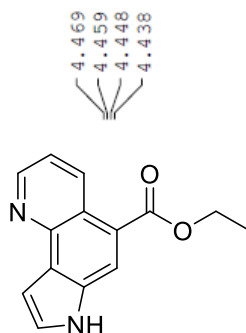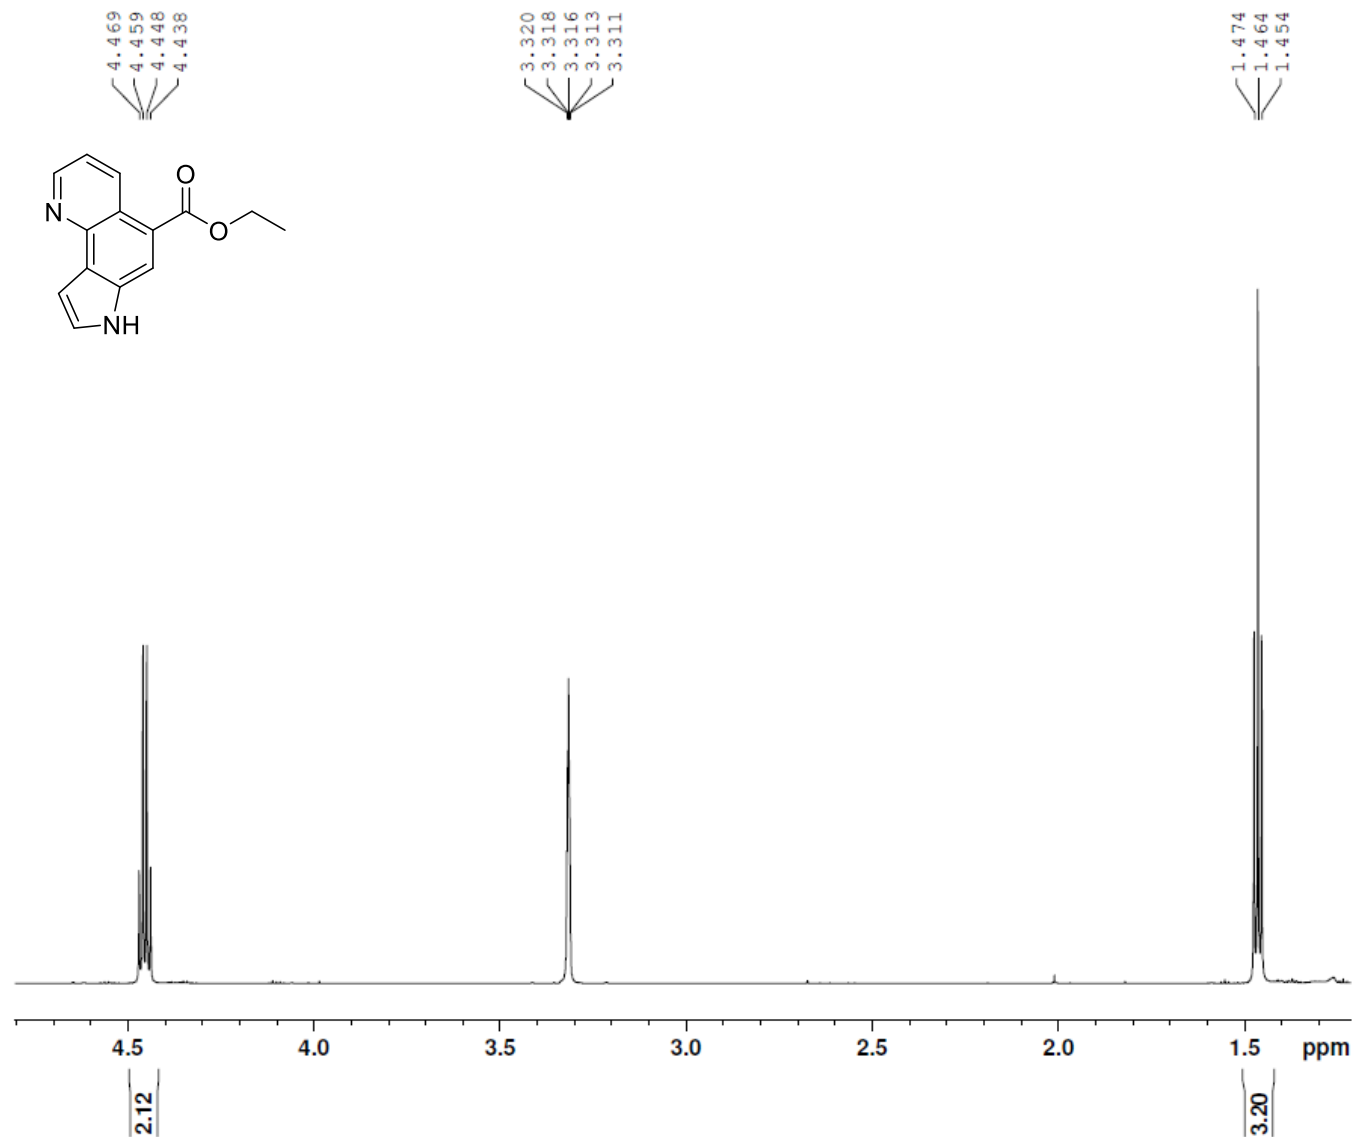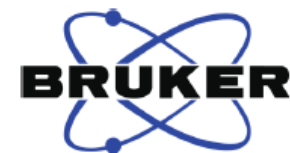

Current Data Parameters  
NAME WS2  
EXPNO 3  
PROCNO 1

F2 - Acquisition Parameters  
Date\_ 20210525  
Time 19.08 h  
INSTRUM spect  
PROBHD Z128968\_0001 (zq30)  
PULPROG zg30  
TD 65536  
SOLVENT MeOD  
NS 32  
DS 2  
SWH 14097.744 Hz  
FIDRES 0.430229 Hz  
AQ 2.3243434 sec  
RG 4.04  
DW 35.467 usec  
DE 10.00 usec  
TE 298.0 K  
D1 1.00000000 sec  
TD0 1  
SFO1 700.5343258 MHz  
NUC1 1H  
P1 15.00 usec  
PLW1 8.39560032 W

F2 - Processing parameters  
SI 65536  
SF 700.5300094 MHz  
WDW EM  
SSB 0  
LB 0.30 Hz  
GB 0  
PC 1.00

SB-03-08\_13C

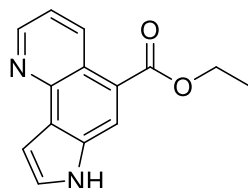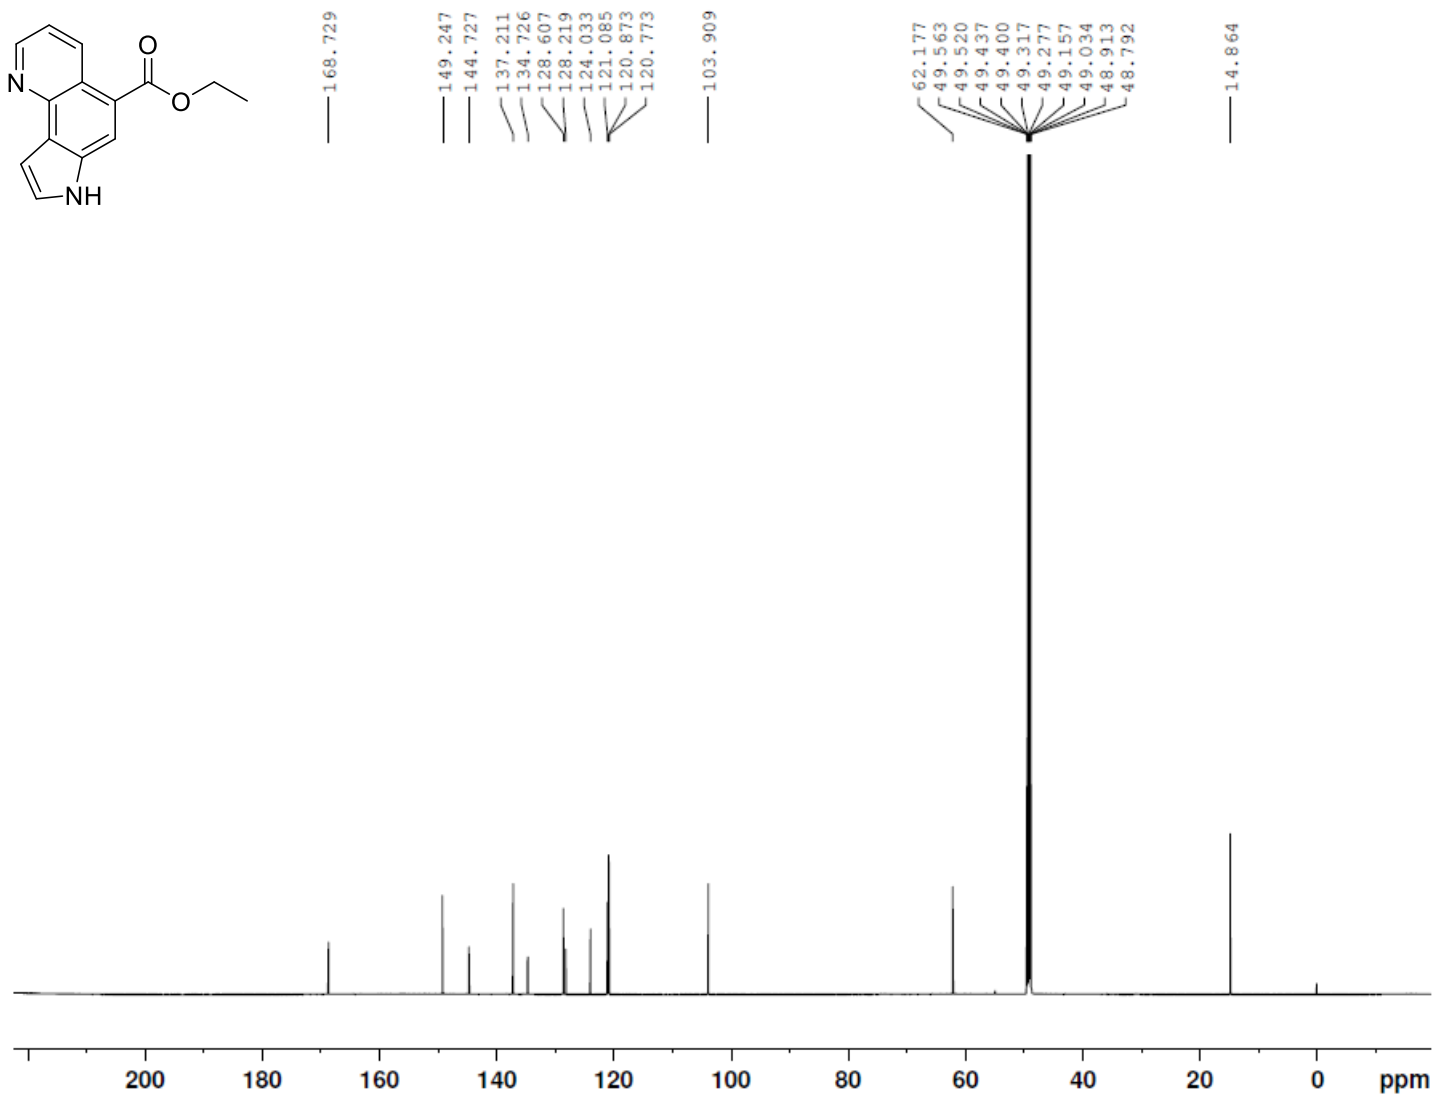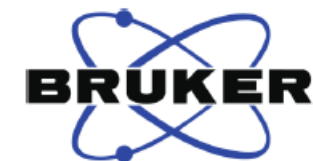

Current Data Parameters  
 NAME WS2  
 EXPNO 4  
 PROCNO 1

F2 - Acquisition Parameters  
 Date\_ 20210525  
 Time 20.46 h  
 INSTRUM spect  
 PROBHD Z128968\_0001 (   
 PULPROG zgpg30  
 TD 65536  
 SOLVENT MeOD  
 NS 2048  
 DS 2  
 SWH 42613.637 Hz  
 FIDRES 1.300465 Hz  
 AQ 0.7689557 sec  
 RG 2050  
 DW 11.733 usec  
 DE 18.00 usec  
 TE 298.0 K  
 D1 2.00000000 sec  
 D11 0.03000000 sec  
 TD0 1  
 SFO1 176.1660234 MHz  
 NUC1 13C  
 P1 12.00 usec  
 PLW1 32.86100006 W  
 SFO2 700.5328021 MHz  
 NUC2 1H  
 CPDPRG[2] waltz16  
 PCPD2 65.00 usec  
 PLW2 8.39560032 W  
 PLW12 0.44710001 W  
 PLW13 0.22513001 W

F2 - Processing parameters  
 SI 32768  
 SF 176.1481345 MHz  
 WDW EM  
 SSB 0  
 LB 1.00 Hz  
 CB 0  
 PC 1.40

SB-03-08\_COSY

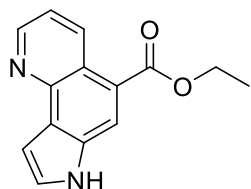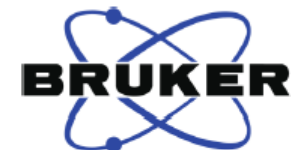

Current Data Parameters  
NAME WS2  
EXPNO 5  
PROCNO 1

F2 - Acquisition Parameters  
Date\_ 20210525  
Time 20.49 h  
INSTRUM spect  
PROBHD z128968\_0001 (f  
PULPROG cosygpppqr  
TD 2048  
SOLVENT MeOD  
NS 16  
DS 16  
SWH 7692.308 Hz  
FIDRES 7.512019 Hz  
AQ 0.1331200 sec  
RG 7.83  
DW 65.000 usec  
DE 10.00 usec  
TE 298.0 K  
D0 0.00000300 sec  
D1 1.97951996 sec  
D11 0.03000000 sec  
D12 0.00002000 sec  
D13 0.00000400 sec  
D16 0.00020000 sec  
IN0 0.00013000 sec  
TDav 1  
SF01 700.5336610 MHz  
NUC1 1H  
P0 15.00 usec  
P1 15.00 usec  
P17 2500.00 usec  
PLW1 8.39560032 W  
PLW10 3.02239990 W  
GPNAM[1] SMSQ10.100  
GPZ1 10.00 %  
P16 1000.00 usec

F1 - Acquisition parameters  
ID 128  
SF01 700.5337 MHz  
FIDRES 120.192307 Hz  
SW 10.981 ppm  
FnMODE QF

F2 - Processing parameters  
SI 1024  
SF 700.5300094 MHz  
WDW QSINE  
SSB 0  
LB 0 Hz  
GB 0  
PC 1.40

F1 - Processing parameters  
SI 1024  
MC2 QF  
SF 700.5300094 MHz  
WDW QSINE  
SSB 0  
LB 0 Hz  
GB 0

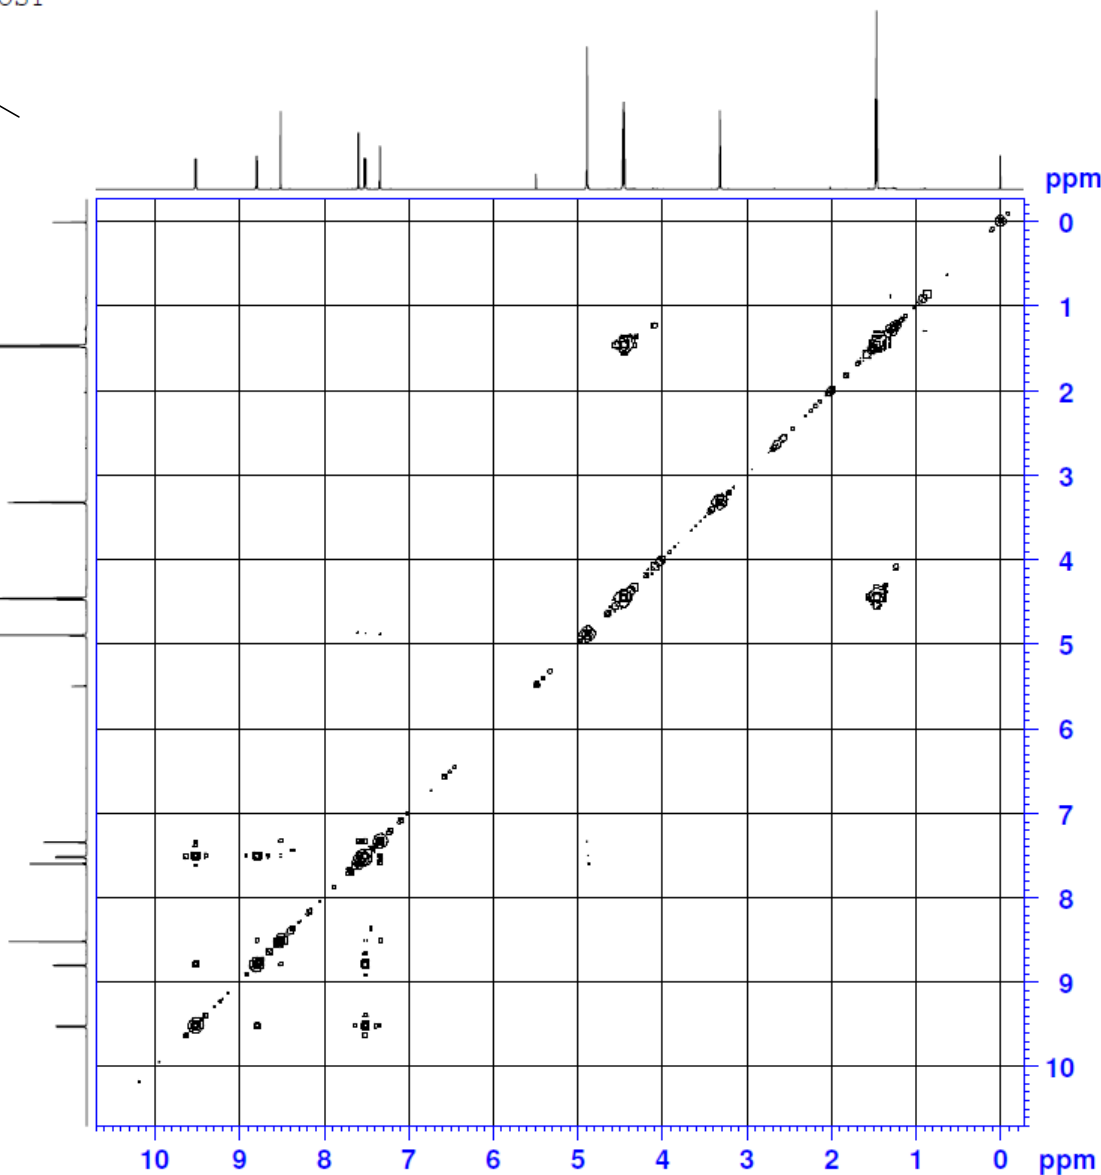

SB-03-08\_HMBC

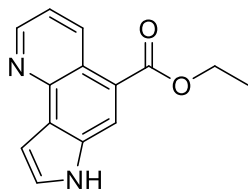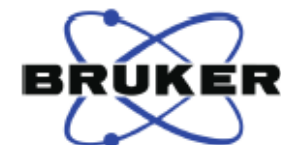

Current Data Parameters  
NAME WS2  
EXPNO 7  
PROCNO 1

F2 - Acquisition Parameters  
Date\_ 20210526  
Time 0.21 h  
INSTRUM spect  
PROBHD Z12896g\_0001 ( hmbcetgpl3nd  
PULPROG  
TD 4096  
SOLVENT MeOD  
NS 32  
DS 16  
SWH 7692.308 Hz  
FIDRES 3.756010 Hz  
AQ 0.2662400 sec  
RG 2050  
DM 65.000 usec  
DE 10.00 usec  
TE 298.0 K  
CMT6 120.0000000  
CMT7 170.0000000  
CMT13 8.0000000  
D0 0.0000000 sec  
D1 1.95904005 sec  
D6 0.06250000 sec  
D16 0.00020000 sec  
IN0 0.00001290 sec  
TD0 1  
SFO1 700.5316610 MHz  
NUC1 1H  
P1 15.00 usec  
P2 30.00 usec  
PLM1 8.39560032 W  
SFO2 176.1660234 MHz  
NUC2 13C  
P3 12.00 usec  
P24 2000.00 usec  
PLM2 32.86100006 W  
SFOAL7 [7] Crp80comp.4  
SFOAL7 0.500  
SFOFF27 0 Hz  
SFW 3.64000034 W  
CPAM[1] SMSQ10.100  
CP21 80.00 %  
CPAM[3] SMSQ10.100  
CP23 14.00 %  
CPAM[4] SMSQ10.100  
CP24 -8.00 %  
CPAM[5] SMSQ10.100  
CP25 -4.00 %  
CPAM[6] SMSQ10.100  
CP26 -2.00 %  
P16 1000.00 usec

F1 - Acquisition parameters  
TD 256  
SFO1 176.166 MHz  
FIDRES 302.810089 Hz  
SW 220.018 ppm  
P0MODE Echo-Antiecho

F2 - Processing parameters  
SI 2048  
SF 700.5300094 MHz  
WDW SINK  
SSB 0 Hz  
LB 0  
GB 0  
PC 1.40

F1 - Processing parameters  
SI 1024  
WC2 echo-antiecho  
SF 176.1481335 MHz  
WDW QSINK  
SSB 2  
LB 0 Hz  
GB 0

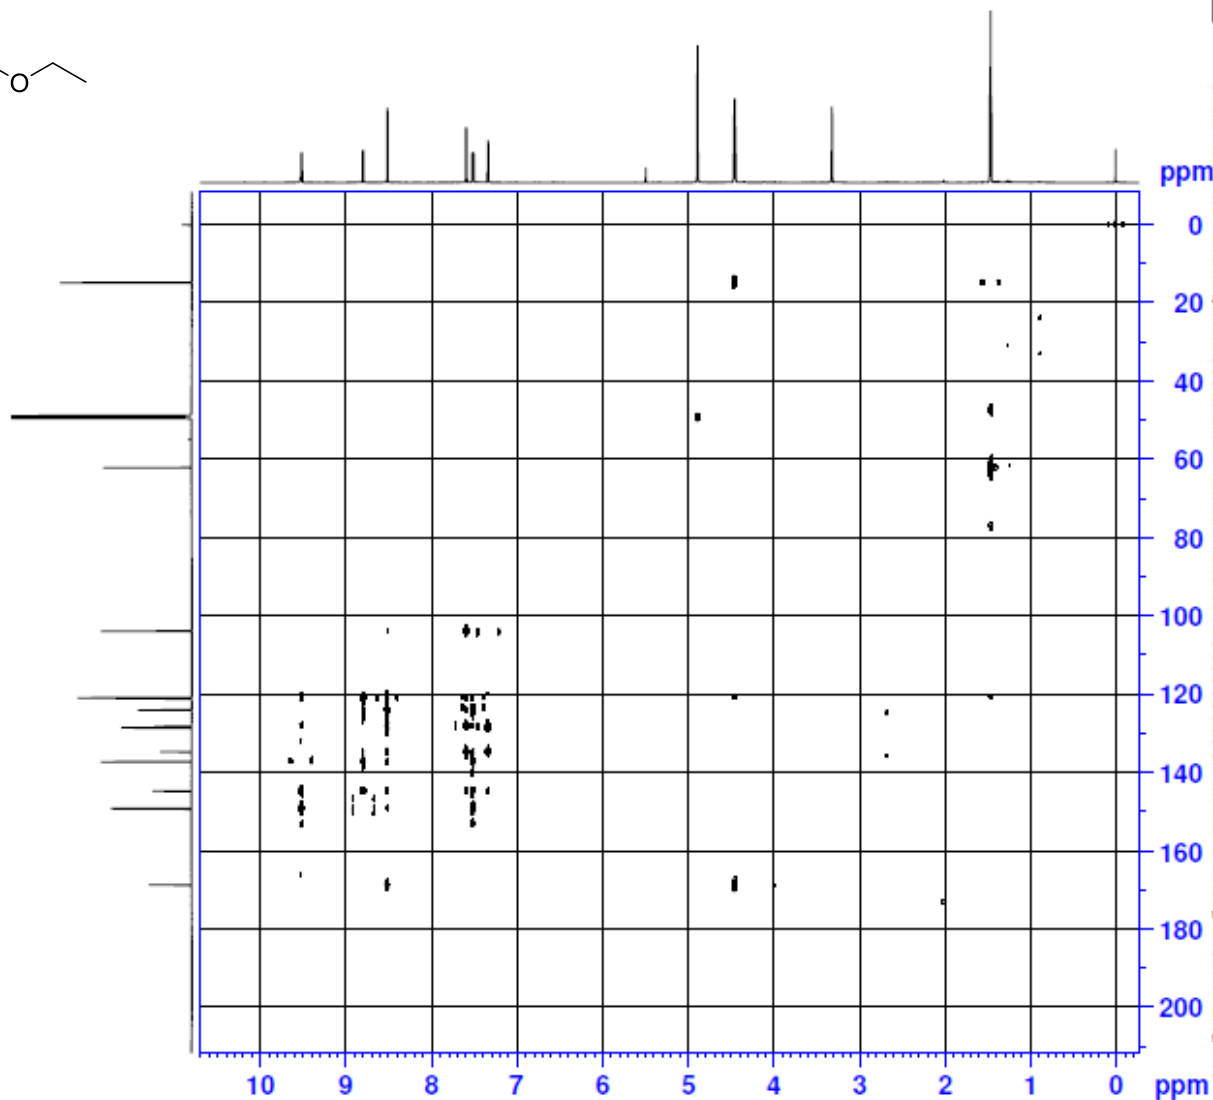

SB-03-08\_HMBC

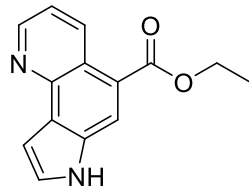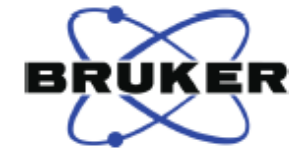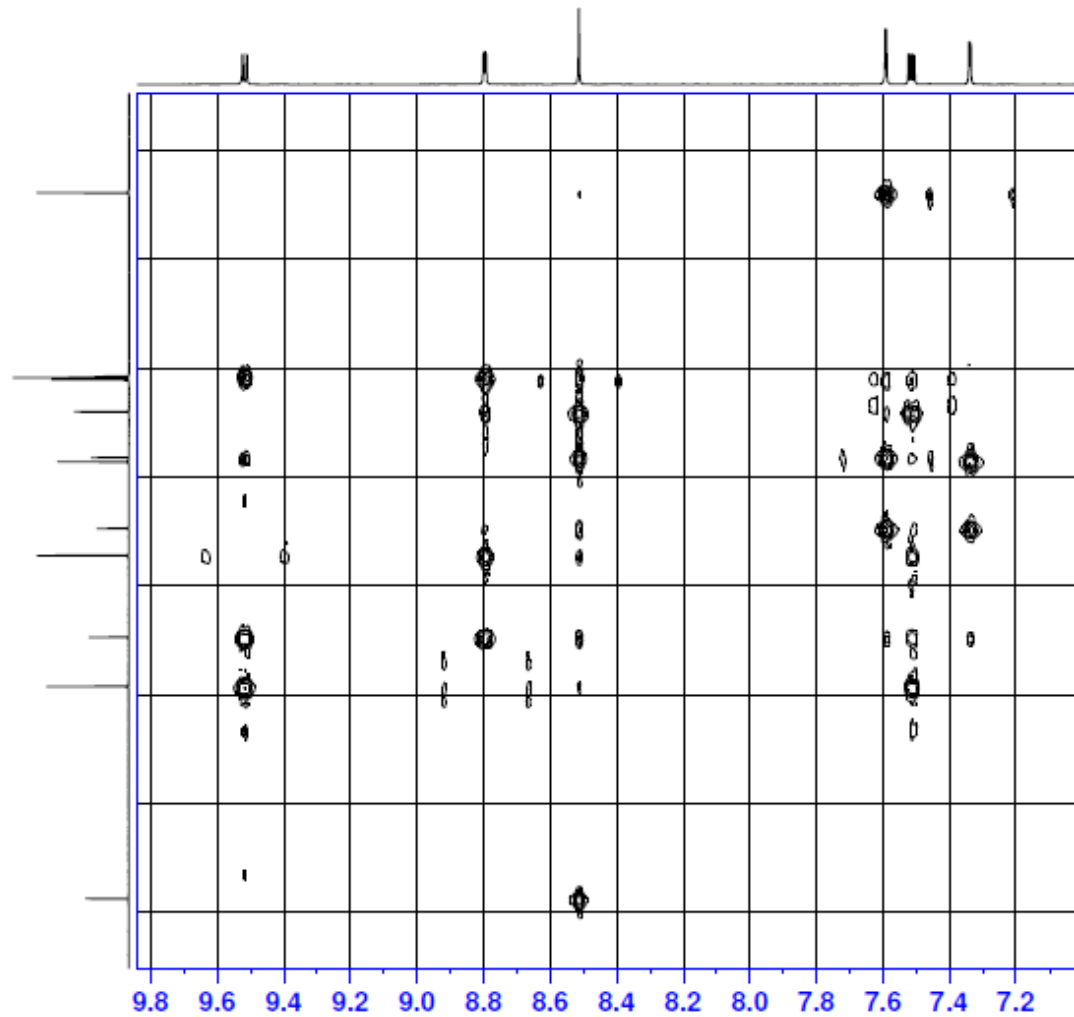

Current Data Parameters  
NAME WS2  
EXPNO 7  
PROCNO 1

F2 - Acquisition Parameters  
Date\_ 20210526  
Time 0.21 h  
INSTRUM spect  
PROBHD E128964\_0001 (4  
PULPROG hmcetgpl3nd  
TD 4096  
SOLVENT MeOD  
NS 32  
DS 16  
SWH 7692.308 Hz  
FIDRES 3.756010 Hz  
AQ 0.2642400 sec  
RG 2050  
DM 65.000 usec  
DE 10.00 usec  
TE 298.0 K  
CMT6 120.000000  
CMT7 170.000000  
CMT13 8.000000  
D0 0.00000300 sec  
D1 1.95904005 sec  
D6 0.06250000 sec  
D16 0.00020000 sec  
IN0 0.0001290 sec  
TDev 1  
SFO1 700.5336410 MHz  
NUC1 1H  
P1 15.00 usec  
P2 30.00 usec  
PLW1 8.39560032 W  
SFO2 176.1640234 MHz  
NUC2 13C  
P3 12.00 usec  
P24 2000.00 usec  
PLW2 32.86100006 W  
SFOAL7 SFOAL7  
SFOFF7 0 Hz  
SFW7 3.64000034 W  
CFNAM[1] SMSQ10.100  
CFE1 80.00 %  
CFNAM[3] SMSQ10.100  
CFE3 14.00 %  
CFNAM[4] SMSQ10.100  
CFE4 -8.00 %  
CFNAM[5] SMSQ10.100  
CFE5 -4.00 %  
CFNAM[6] SMSQ10.100  
CFE6 -2.00 %  
P16 1000.00 usec

F1 - Acquisition parameters  
TD 256  
SFO1 176.166 MHz  
FIDRES 302.810089 Hz  
DM 220.018 ppm  
PnMODE Echo-Antiecho

F2 - Processing parameters  
S1 2048  
SF 700.5300094 MHz  
WDW SINK  
SSB 4  
LB 0 Hz  
GB 0  
PC 1.40

F1 - Processing parameters  
S1 1024  
WC2 echo-antiecho  
SF 176.1481335 MHz  
WDW QSINK  
SSB 2  
LB 0 Hz  
GB 0

SB-03-08\_HMBC

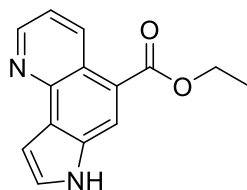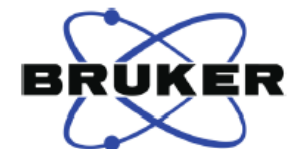

Current Data Parameters  
NAME ws2  
EXPNO 7  
PROCNO 1

F2 - Acquisition Parameters  
Date\_ 20210526  
Time 0.21 h  
INSTRUM spect  
PROBHD z128968\_0001 (hmbcetgpl3nd)  
PULPROG 4096  
TD 4096  
SOLVENT MeOD  
NS 32  
DS 16  
SWH 7692.308 Hz  
FIDRES 3.756010 Hz  
AQ 0.2662400 sec  
RG 2050  
INW 65.000 usec  
DE 10.00 usec  
TE 298.0 K  
CNST6 120.0000000  
CNST7 170.0000000  
CNST13 8.0000000  
D0 0.00000300 sec  
D1 1.95904005 sec  
D6 0.06250000 sec  
D16 0.00020000 sec  
IN0 0.00001290 sec  
TDav 1  
SFO1 700.5336610 MHz  
NUC1 1H  
P1 15.00 usec  
P2 30.00 usec  
P1W1 8.39560032 W  
SFO2 176.1660234 MHz  
NUC2 13C  
P3 12.00 usec  
P24 2000.00 usec  
P1W2 32.86100006 W  
SFOAL7 Crp80comp.4  
SFOAL7 0.300  
SFOFFS7 0 Hz  
SPW7 9.64000034 W  
CPNAM[1] SMSQ10.100  
CPZ1 80.00 %  
CPNAM[3] SMSQ10.100  
CPZ3 14.00 %  
CPNAM[4] SMSQ10.100  
CPZ4 -8.00 %  
CPNAM[5] SMSQ10.100  
CPZ5 -4.00 %  
CPNAM[6] SMSQ10.100  
CPZ6 -2.00 %  
P16 1000.00 usec

F1 - Acquisition parameters  
TD 256  
SFO1 176.166 MHz  
FIDRES 302.810089 Hz  
SW 220.018 ppm  
FMODE Echo-Antiecho

F2 - Processing parameters  
SI 2048  
SF 700.5300094 MHz  
WDW SINE  
SSB 4  
LB 0 Hz  
GB 0  
PC 1.40

F1 - Processing parameters  
SI 1024  
MC2 echo-antiecho  
SF 176.1481335 MHz  
WDW QSINE  
SSB 2  
LB 0 Hz  
GB 0

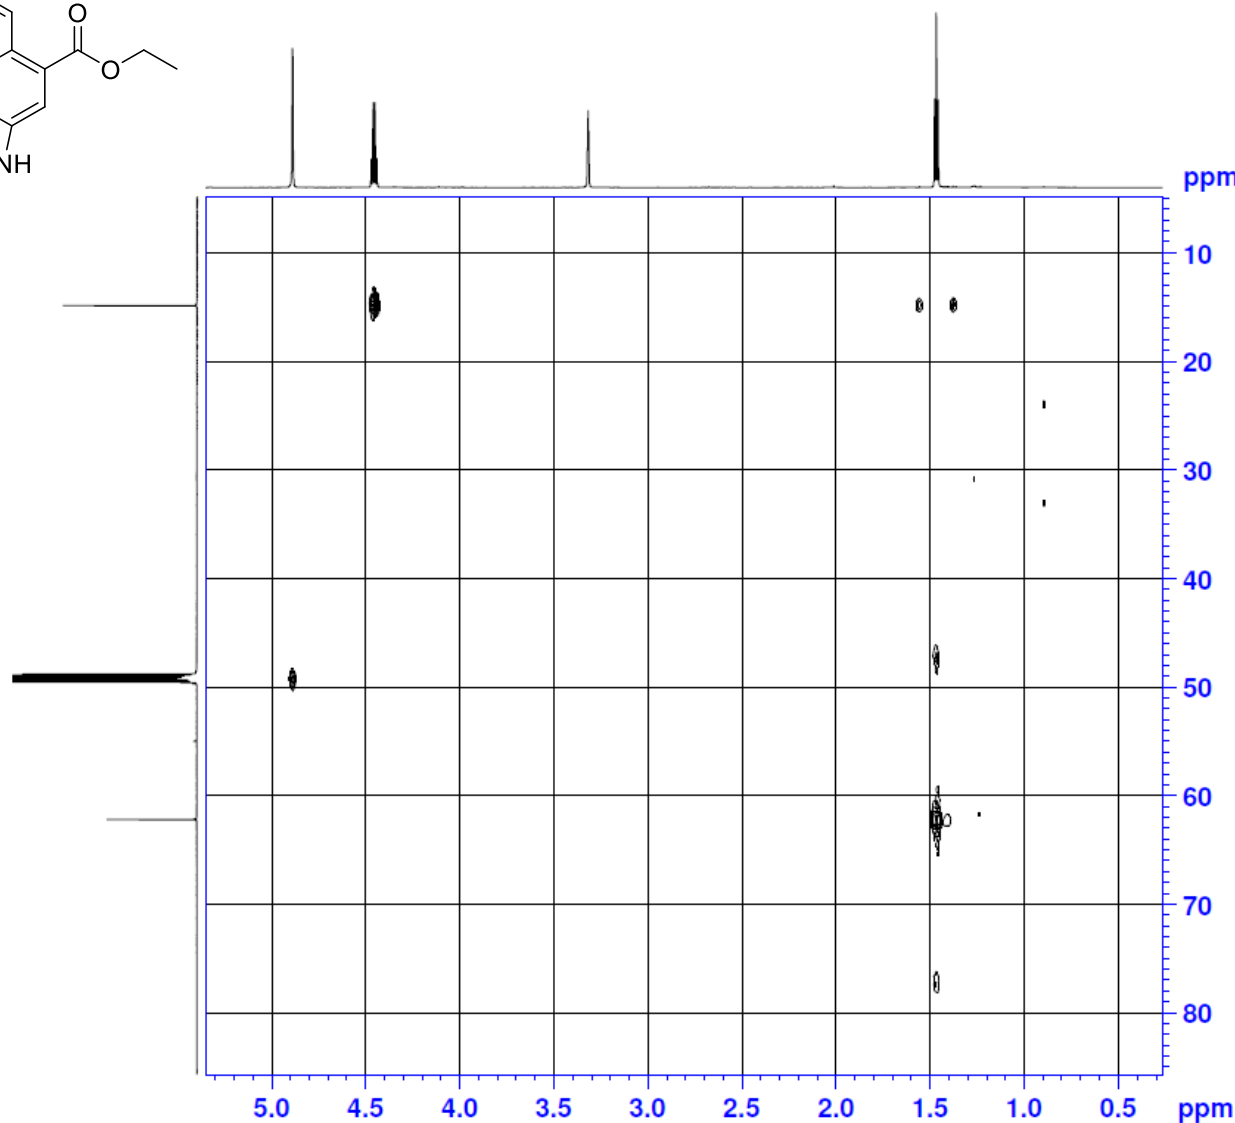



SB-03-08\_HMBC

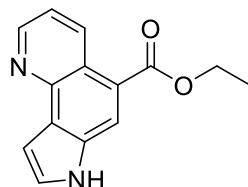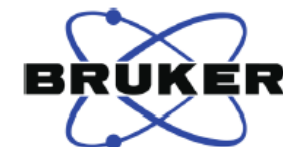

Current Data Parameters  
NAME WS2  
EXPNO 7  
PROCNO 1

F2 - Acquisition Parameters  
Date\_ 20210526  
Time 0.21 h  
INSTRUM spect  
PROBHD z128968\_0001 (hmbcetgpl3nd)  
PULPROG hmbcetgpl3nd  
TD 4096  
SOLVENT MeOD  
NS 32  
DS 16  
SWH 7692.308 Hz  
FIDRES 3.756010 Hz  
AQ 0.2662400 sec  
RG 2050  
DW 65.000 usec  
DE 10.00 usec  
TE 298.0 K  
CNST6 120.0000000  
CNST7 170.0000000  
CNST13 8.0000000  
D0 0.00000300 sec  
D1 1.95904005 sec  
D6 0.06250000 sec  
D16 0.00020000 sec  
IN0 0.00001290 sec  
TD0V 1  
SFO1 700.5336610 MHz  
NUC1 1H  
P1 15.00 usec  
P2 30.00 usec  
P1M1 8.39560032 W  
SFO2 176.1660234 MHz  
NUC2 13C  
P3 12.00 usec  
P24 2000.00 usec  
P1M2 32.86100006 W  
SFO3 700.5336610 MHz  
SFOAL7 0.500  
SFOFFS7 0 Hz  
SFW7 9.64000034 W  
CPNAM[1] SMSQ10.100  
GPZ1 80.00 %  
CPNAM[3] SMSQ10.100  
GPZ3 14.00 %  
CPNAM[4] SMSQ10.100  
GPZ4 -8.00 %  
CPNAM[5] SMSQ10.100  
GPZ5 -4.00 %  
CPNAM[6] SMSQ10.100  
GPZ6 -2.00 %  
P16 1000.00 usec  
F1 - Acquisition parameters  
TD 256  
SFO1 176.166 MHz  
FIDRES 302.810089 Hz  
SW 220.018 ppm  
FnMODE Echo-Antiecho  
F2 - Processing parameters  
SI 2048  
SF 700.5300094 MHz  
WDW SINE  
SSB 4  
LB 0 Hz  
GB 0  
PC 1.40  
F1 - Processing parameters  
SI 1024  
MC2 echo-antiecho  
SF 176.1481335 MHz  
WDW QSINE  
SSB 2  
LB 0 Hz  
GB 0

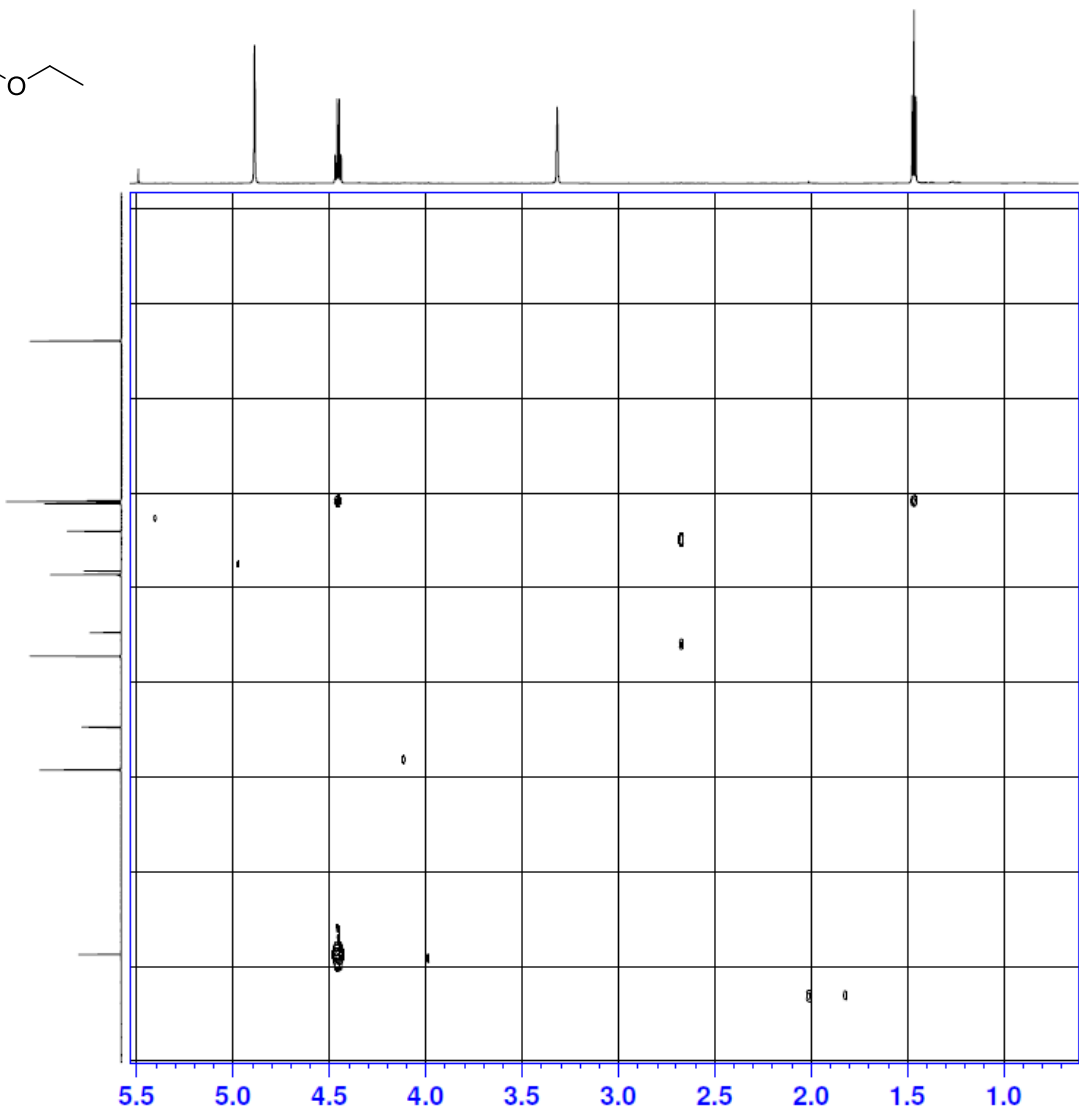



SB-03-08\_NOESY

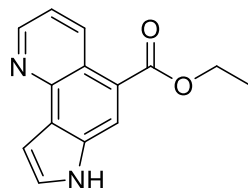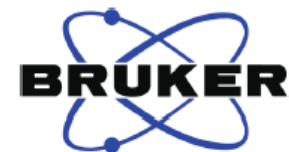

Current Data Parameters  
NAME WS2  
EXPNO 8  
PROCNO 1

F2 - Acquisition Parameters  
Date\_ 20210526  
Time 5.38 h  
INSTRUM spect  
PROBHD z128968\_0001 (   
PULPROG noesygpph  
TD 2048  
SOLVENT MeOD  
NS 32  
DS 32  
SWH 7692.308 Hz  
FIDRES 7.512019 Hz  
AQ 0.1331200 sec  
RG 7.13  
DW 65.000 usec  
DE 10.00 usec  
TE 298.0 K  
D0 0.00004590 sec  
D1 2.01310706 sec  
D8 0.30000001 sec  
D11 0.03000000 sec  
D12 0.00002000 sec  
D16 0.00020000 sec  
IN0 0.00013000 sec  
TDav 1  
SF01 700.5336610 MHz  
NUC1 1H  
P1 15.00 usec  
P2 30.00 usec  
P17 2500.00 usec  
PLW1 8.39560032 W  
PLW10 3.02239990 W  
GPNAM[1] SMSQ10.100  
GPZ1 40.00 %  
P16 1000.00 usec

F1 - Acquisition parameters  
ID 256  
SF01 700.5337 MHz  
FIDRES 60.096153 Hz  
SW 10.981 ppm  
FnMODE States-TPPI

F2 - Processing parameters  
SI 1024  
SF 700.5300094 MHz  
WDW QSINE  
SSB 2  
LB 0 Hz  
GB 0  
PC 1.00

F1 - Processing parameters  
SI 1024  
MC2 States-TPPI  
SF 700.5300094 MHz  
WDW QSINE  
SSB 2  
LB 0 Hz  
GB 0

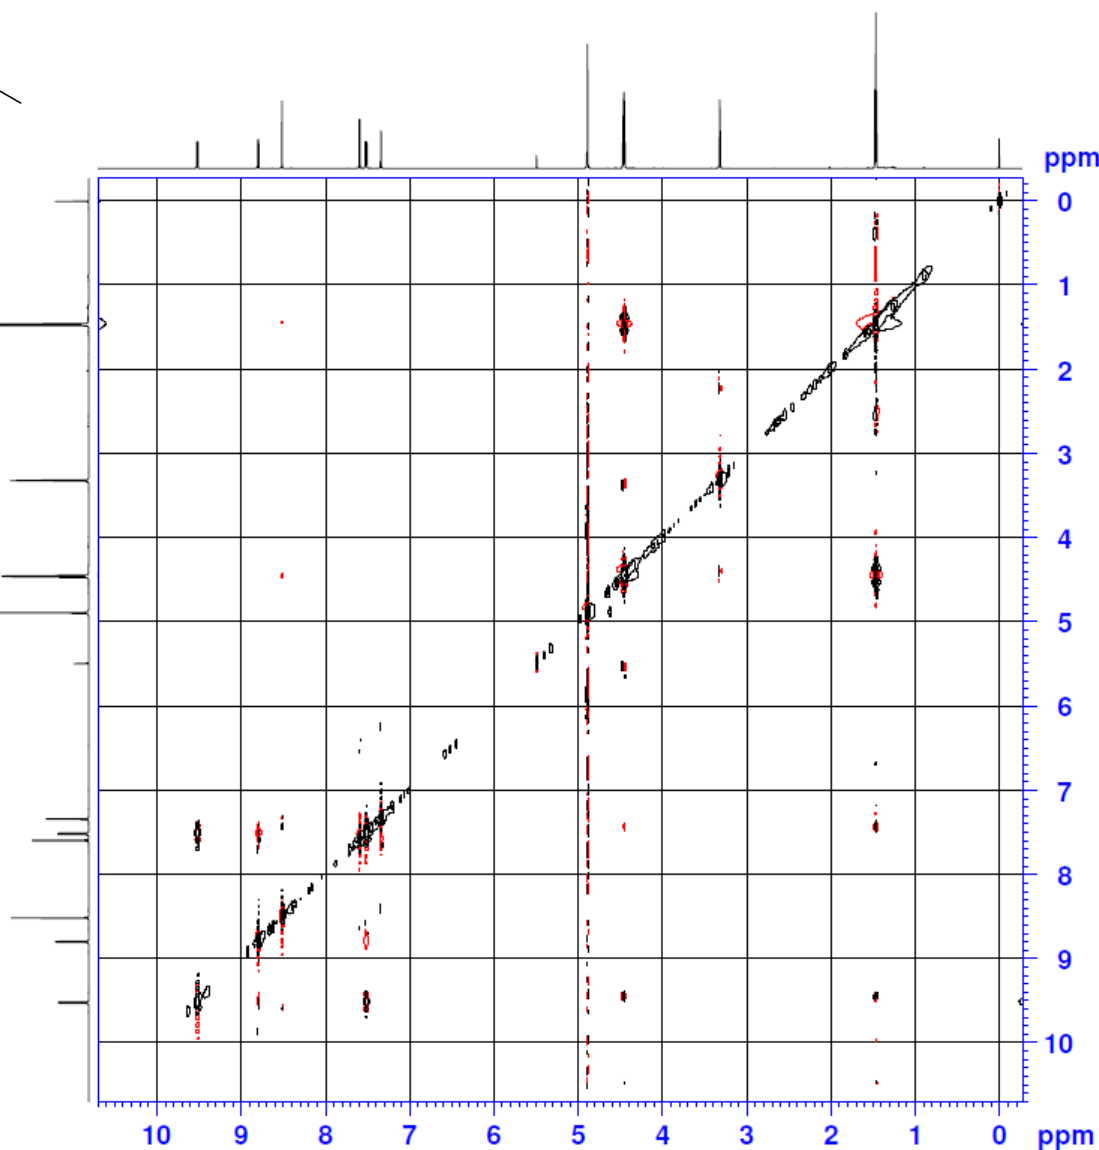

Supplement: s1 [file s1]
